# Supplementary material for: Asymmetric transfer hydrogenation of α-amino β-keto ester hydrochlorides through dynamic kinetic resolution
Source: Royal Society of Chemistry journal article supplement (doi:10.1039/c5ra10385a), 2015-01-01
Supplement: c5ra10385a1.pdf [file c5ra10385a1.pdf]

## SUPPORTING INFORMATION

### Asymmetric transfer hydrogenation of $\alpha$ -amino $\beta$ -keto ester hydrochlorides through dynamic kinetic resolution

Pierre-Georges Echeverria,<sup>a</sup> Johan Cornil,<sup>b</sup> Charlène Férard,<sup>a</sup> Amandine Guérinot,<sup>b</sup> Janine Cossy,<sup>b</sup> Phannarath Phansavath,<sup>\*a</sup> and Virginie Ratovelomanana-Vidal<sup>\*a</sup>

<sup>a</sup>Institut de Recherche de Chimie Paris. Chimie ParisTech, CNRS, PSL Research University, 11 rue Pierre et Marie Curie 75005 Paris, France. E-mail: phannarath.phansavath@chimie-paristech.fr, virginie.vidal@chimie-paristech.fr

<sup>b</sup>Laboratoire de Chimie Organique, Institute of Chemistry, Biology and Innovation (CBI)-UMR 8231, ESPCI ParisTech, CNRS, 10 rue Vauquelin 75231 Paris Cedex 05, France. E-mail: janine.cossy@espci.fr

|                                                                                     |           |
|-------------------------------------------------------------------------------------|-----------|
| Analytical data for compounds <b>2a–2c</b> and <b>2e–2k</b> .....                   | S2 to S5  |
| Copies of NMR and SFC/HPLC spectra of compounds <b>2a–2c</b> and <b>2e–2k</b> ..... | S6 to S26 |

### Methyl (2*R*,3*R*)-2-benzamido-3-hydroxy-3-phenylpropanoate 2a

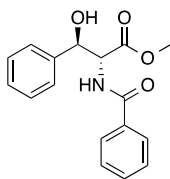

2a

White solid, 76% yield, *anti:syn* = 83:17, *er<sub>anti</sub>* = 99:1,  $[\alpha]_D^{20}$  -113.7 (*c* 0.88, CHCl<sub>3</sub>), <sup>1</sup>H NMR (300 MHz, CDCl<sub>3</sub>) (*anti*):  $\delta$ =7.66–7.62 (m, 2H; CH), 7.44–7.37 (m, 1H; CH), 7.35–7.28 (m, 2H; CH), 7.23–7.15 (m, 5H; CH), 6.90 (d, *J*=7.4 Hz, 1H; NH), 5.24 (bs, 1H; CH), 5.10 (dd, *J*=7.4, 3.6 Hz, 1H; CH), 4.64 (bs, 1H; OH), 3.62 (s, 3H; CH<sub>3</sub>), <sup>13</sup>C NMR (75 MHz, CDCl<sub>3</sub>) (*anti*):  $\delta$ =169.9, 168.4, 139.0, 133.0, 132.0, 128.6, 128.2, 128.0, 127.1, 125.8, 75.0, 59.3, 52.5, SFC : Chiralpak AD-H, scCO<sub>2</sub>/MeOH 85/15, 3 mL/min, P = 150 bar,  $\lambda$  = 215 nm, *t<sub>R</sub>* [*syn*] = 7.75 min, *t<sub>R</sub>* [*syn*] = 8.73 min, *t<sub>R</sub>* [*anti*-(*R,R*)] = 10.38 min (major), *t<sub>R</sub>* [*anti*-(*S,S*)] = 11.39 min.

### Methyl (2*R*,3*R*)-2-benzamido-3-hydroxy-3-(*p*-tolyl)propanoate 2b

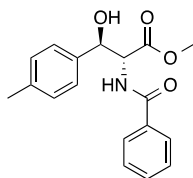

2b

White solid, 90% yield, *anti:syn* = 79:21, *er<sub>anti</sub>* > 94:6,  $[\alpha]_D^{20}$  -105.9 (*c* 0.92, CHCl<sub>3</sub>), <sup>1</sup>H NMR (300 MHz, CDCl<sub>3</sub>) (*anti*):  $\delta$ =7.74 (d, *J*=7.0 Hz, 2H; CH), 7.55–7.26 (m, 4H; CH), 7.17–7.09 (m, 3H; CH), 6.91 (d, *J*=7.2 Hz, 1H; NH), 5.32 (bs, 1H; CH), 5.20 (dd, *J*=7.2, 3.6 Hz, 1H; CH), 4.52 (d, *J*=5.3 Hz, 1H; OH), 3.75 (s, 3H; CH<sub>3</sub>), 2.32 (s, 3H; CH<sub>3</sub>), <sup>13</sup>C NMR (75 MHz, CDCl<sub>3</sub>) (*anti*):  $\delta$ =170.0, 168.5, 137.8, 136.0, 133.1, 132.1, 129.0, 128.6, 127.2, 125.8, 75.1, 59.4, 52.6, 21.1, SFC : Chiralpak AD-H, scCO<sub>2</sub>/MeOH 89/11, 3 mL/min, P = 100 bar,  $\lambda$  = 215 nm, *t<sub>R</sub>* [*syn*] = 10.93 min, *t<sub>R</sub>* [*syn*] = 22.87 min, *t<sub>R</sub>* [*anti*-(*R,R*)] = 24.93 min (major), *t<sub>R</sub>* [*anti*-(*S,S*)] = 27.02 min.

### Methyl (2*R*,3*R*)-2-benzamido-3-hydroxy-3-(*m*-tolyl)propanoate 2c

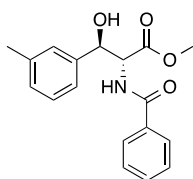

2c

Pale yellow solid, 77% yield, *anti:syn* = 80:20, *er<sub>anti</sub>* = 99:1,  $[\alpha]_D^{20}$  -121.8 (*c* 0.65, CHCl<sub>3</sub>), <sup>1</sup>H NMR (300 MHz, CDCl<sub>3</sub>) (*anti*):  $\delta$ =7.64 (d, *J*=6.9 Hz, 2H; CH), 7.43–7.20 (m, 3H; CH), 7.13–7.07 (m, 2H; CH), 7.03–6.93 (m, 2H; CH), 6.90 (d, *J*=7.5 Hz, 1H; NH), 5.19 (bs, 1H; CH), 5.07 (dd, *J*=7.5, 3.7 Hz, 1H; CH), 4.52 (bs, 1H; OH), 3.61 (s, 3H; CH<sub>3</sub>), 2.21 (s, 3H; CH<sub>3</sub>), <sup>13</sup>C NMR (75 MHz, CDCl<sub>3</sub>) (*anti*):  $\delta$ =170.0, 168.3, 139.0, 137.8, 133.1, 132.0, 128.8, 128.5, 128.1, 127.1, 126.5, 122.9, 74.9, 59.3, 52.4, 21.3, HPLC : Chiralpak IC, hexane/*i*PrOH 90/10, 1 mL/min,  $\lambda$  = 215 nm; *t<sub>R</sub>* [*syn*] = 22.06 min, *t<sub>R</sub>* [*syn*] = 34.44 min, *t<sub>R</sub>* [*anti*-(*R,R*)] = 47.06 min (major), *t<sub>R</sub>* [*anti*-(*S,S*)] = 59.18 min.

### Methyl (2*R*,3*R*)-2-benzamido-3-hydroxy-3-(4-methoxyphenyl)propanoate **2e**

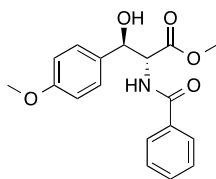

**2e**

White solid, 69% yield, *anti:syn* = 79:21, *er<sub>anti</sub>* = 97:3,  $[\alpha]_D^{20}$  -109.7 (*c* 1.69, CHCl<sub>3</sub>), <sup>1</sup>H NMR (300 MHz, CDCl<sub>3</sub>) (*anti*):  $\delta$ =7.73 (d, *J*=7.3 Hz, 2H; CH), 7.53–7.24 (m, 3H; CH), 7.19 (d, *J*=8.8 Hz, 2H; CH), 6.94 (d, *J*=7.3 Hz, 1H; NH), 6.83 (d, *J*=8.8 Hz, 2H; CH), 5.28 (s, 1H; CH), 5.16 (dd, *J*=7.3, 3.7 Hz, 1H; CH), 4.56 (bs, 1H; OH), 3.76 (s, 3H; CH<sub>3</sub>), 3.72 (s, 3H; CH<sub>3</sub>), <sup>13</sup>C NMR (75 MHz, CDCl<sub>3</sub>) (*anti*):  $\delta$ =170.1, 168.4, 159.3, 133.1, 132.0, 131.1, 128.6, 127.1 (2C), 113.7, 74.7, 59.3, 55.1, 52.6, HPLC : Chiralpak IA, hexane/*i*PrOH 90/10, 1 mL/min,  $\lambda$  = 215 nm; *t<sub>R</sub>* [*syn*] = 37.10 min, *t<sub>R</sub>* [*anti*-(*S,S*)] = 43.92 min, *t<sub>R</sub>* [*syn*] = 51.40 min, *t<sub>R</sub>* [*anti*-(*R,R*)] = 65.26 min (major).

### Methyl (2*R*,3*R*)-2-benzamido-3-hydroxy-3-(naphthalen-2-yl)propanoate **2f**

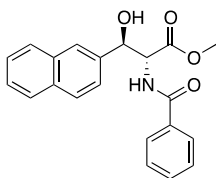

**2f**

White solid, 90% yield, *anti:syn* = 78:22, *er<sub>anti</sub>* = 96:4,  $[\alpha]_D^{20}$  -112.4 (*c* 0.90, CHCl<sub>3</sub>), <sup>1</sup>H NMR (300 MHz, CDCl<sub>3</sub>) (*anti*):  $\delta$ =7.86–7.63 (m, 6H; CH), 7.54–7.26 (m, 6H; CH), 6.97 (d, *J*=7.1 Hz, 1H; NH), 5.53 (bs, 1H; CH), 5.30 (dd, *J*=7.2, 3.4 Hz, 1H; CH), 4.75 (d, *J*=5.3 Hz, 1H; OH), 3.73 (s, 3H; CH<sub>3</sub>), <sup>13</sup>C NMR (75 MHz, CDCl<sub>3</sub>) (*anti*):  $\delta$ =169.9, 168.7, 136.6, 133.6, 133.13, 133.1, 133.06, 132.2, 128.7, 128.1, 128.0, 127.7, 127.2, 126.2, 126.1, 125.0, 123.7, 75.4, 59.5, 52.7, SFC : Chiralpak AD-H, scCO<sub>2</sub>/MeOH 85/15, 4 mL/min, P = 100 bar,  $\lambda$  = 215 nm, *t<sub>R</sub>* [*syn*] = 8.98 min, *t<sub>R</sub>* [*anti*-(*R,R*)] = 21.35 min (major), *t<sub>R</sub>* [*syn*] = 23.76 min, *t<sub>R</sub>* [*anti*-(*S,S*)] = 28.55 min.

### Methyl (2*R*,3*R*)-2-benzamido-3-(4-chlorophenyl)-3-hydroxypropanoate **2g**

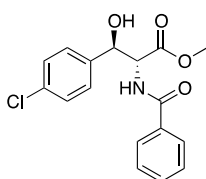

**2g**

White solid, 82% yield, *anti:syn* = 76:24, *er<sub>anti</sub>* = 93:7,  $[\alpha]_D^{20}$  -100.5 (*c* 1.53, CHCl<sub>3</sub>), <sup>1</sup>H NMR (300 MHz, CDCl<sub>3</sub>) (*anti*):  $\delta$ =7.65–7.61 (m, 2H; CH), 7.46–7.10 (m, 7H; CH), 6.93 (d, *J*=7.2 Hz, 1H; NH), 5.21 (bs, 1H; CH), 5.06 (dd, *J*=7.2, 3.4 Hz, 1H; CH), 4.84 (d, *J*=5.1 Hz, 1H; OH), 3.64 (s, 3H; CH<sub>3</sub>), <sup>13</sup>C NMR (75 MHz, CDCl<sub>3</sub>) (*anti*):  $\delta$ =169.7, 168.6, 137.7, 133.7, 132.8, 132.4, 128.7, 128.4, 127.3, 127.1, 74.5, 59.4, 52.7, SFC : Chiralpak AD-H, scCO<sub>2</sub>/MeOH 85/15, 4 mL/min, P = 100 bar,  $\lambda$  = 215 nm, *t<sub>R</sub>* [*syn*] = 5.23 min, *t<sub>R</sub>* [*syn*] = 8.36 min, *t<sub>R</sub>* [*anti*-(*S,S*)] = 12.68 min, *t<sub>R</sub>* [*anti*-(*R,R*)] = 15.26 min (major).

### Methyl (2*R*,3*R*)-2-benzamido-3-(4-bromophenyl)-3-hydroxypropanoate 2h

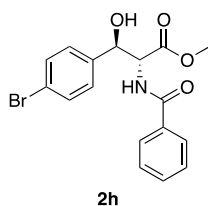

White solid, 66% yield, *anti:syn* = 74:26,  $er_{anti}$  = 95:5,  $[\alpha]_D^{20}$  -87.0 (*c* 1.42, CHCl<sub>3</sub>), <sup>1</sup>H NMR (300 MHz, CDCl<sub>3</sub>) (*anti*):  $\delta$ =7.63 (d, *J*=7.7 Hz, 2H; CH), 7.46–7.22 (m, 5H; CH), 7.05 (d, *J*=7.7 Hz, 2H; CH), 6.94 (d, *J*=7.2 Hz, 1H; NH), 5.19 (bs, 1H; CH), 5.05 (dd, *J*=7.2, 3.4 Hz, 1H; CH), 4.86 (s, 1H; OH), 3.63 (s, 3H; CH<sub>3</sub>), <sup>13</sup>C NMR (75 MHz, CDCl<sub>3</sub>) (*anti*):  $\delta$ =169.6, 168.5, 138.3, 132.7, 132.2, 131.3, 128.6, 127.6, 127.1, 121.9, 74.5, 59.3, 52.7, SFC : Chiralpak AD-H, scCO<sub>2</sub>/MeOH 80/20, 4 mL/min, P = 150 bar,  $\lambda$  = 215 nm,  $t_R$  [*syn*] = 3.46 min,  $t_R$  [*syn*] = 5.53 min,  $t_R$  [*anti*-(*S,S*)] = 8.68 min,  $t_R$  [*anti*-(*R,R*)] = 11.02 min (major).

### Methyl (2*R*,3*R*)-2-benzamido-3-(4-fluorophenyl)-3-hydroxypropanoate 2i

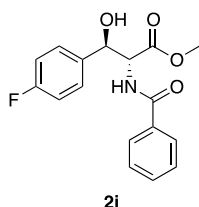

White solid, 82% yield, *anti:syn* = 76:24,  $er_{anti}$  = 93:7,  $[\alpha]_D^{20}$  -98.6 (*c* 0.98, CHCl<sub>3</sub>), <sup>1</sup>H NMR (300 MHz, CDCl<sub>3</sub>) (*anti*):  $\delta$ =7.64 (d, *J*=7.0 Hz, 2H; CH), 7.45–7.13 (m, 5H; CH), 6.91 (t, *J*=8.6 Hz, 3H; CH,NH), 5.24 (d, *J*=3.5 Hz, 1H; CH), 5.07 (dd, *J*=7.1, 3.5 Hz, 1H; CH), 3.65 (s, 3H; CH<sub>3</sub>), <sup>13</sup>C NMR (75 MHz, CDCl<sub>3</sub>) (*anti*):  $\delta$ =169.8, 168.6, 162.4 (d, *J*=246.2 Hz), 134.9 (d, *J*=3.0 Hz), 132.8, 132.2, 128.7, 127.5, 127.1, 115.2 (d, *J*=21.6 Hz), 74.5, 59.4, 52.7, SFC : Chiralpak AD-H, scCO<sub>2</sub>/MeOH 85/15, 4 mL/min, P = 150 bar,  $\lambda$  = 215 nm,  $t_R$  [*syn*] = 3.04 min,  $t_R$  [*syn*] = 4.22 min,  $t_R$  [*anti*-(*S,S*)] = 5.42 min,  $t_R$  [*anti*-(*R,R*)] = 7.12 min (major).

### Methyl (2*S*,3*S*)-2-benzamido-3-(furan-2-yl)-3-hydroxypropanoate 2j

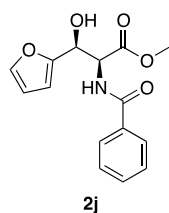

Orange solid, 66% yield, *anti:syn* = 41:59,  $er_{anti}$  = 95:5,  $er_{syn}$  > 99:1,  $[\alpha]_D^{20}$  -44.0 (*c* 0.66, CHCl<sub>3</sub>), <sup>1</sup>H NMR (300 MHz, CDCl<sub>3</sub>) (*syn*):  $\delta$ =7.75–7.71 (m, 2H; CH), 7.53–7.31 (m, 4H; CH), 7.18 (d, *J*=8.8 Hz, 1H; NH), 6.31–6.29 (m, 1H; CH), 6.25 (dd, *J*=3.3, 1.8 Hz, 1H; CH), 5.36–5.31 (m, 1H; CH), 5.17 (dd, *J*=8.8, 3.2 Hz, 1H), 4.24 (bs, 1H; OH), 3.73 (s, 3H; CH<sub>3</sub>), <sup>13</sup>C NMR (75 MHz, CDCl<sub>3</sub>) (*syn*):  $\delta$ =170.5, 167.8, 152.6, 142.4, 133.6, 131.7, 128.4, 127.1, 110.2, 107.2, 68.2, 56.4, 52.7, SFC (*er* measurement for the *anti* compound) : Chiralpak IC, scCO<sub>2</sub>/MeOH 90/10, 4 mL/min, P = 150 bar,  $\lambda$  = 215 nm,  $t_R$  [*syn* × 2] = 4.49 min,  $t_R$  [*anti*] = 6.55 min,  $t_R$  [*anti*] = 7.59 min, SFC (*er* measurement for the *syn* compound) : Chiralcel OD-H, scCO<sub>2</sub>/MeOH 95/5, 2 mL/min, P = 150 bar,  $\lambda$  = 215 nm,  $t_R$  [*syn*] = 10.74 min,  $t_R$  [*anti* × 2] = 11.78 min,  $t_R$  [*syn*] = 14.63 min.

## Methyl (2*S*,3*S*)-2-benzamido-3-hydroxy-3-(thiophen-2-yl)propanoate 2k

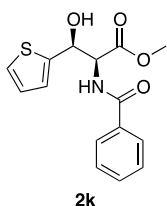

Orange oil, 79% yield, *anti:syn* = 32:68,  $er_{syn} > 99:1$ ,  $er_{anti} = 98:2$ ,  $[\alpha]_D^{20} -48.1$  ( $c$  0.80,  $CHCl_3$ ),  $^1H$  NMR (300 MHz,  $CDCl_3$ ) (*syn*):  $\delta=7.79-7.75$  (m, 2H; CH), 7.56–7.35 (m, 4H; CH), 7.21 (dd,  $J=5.1, 1.3$  Hz, 1H; CH), 7.15 (d,  $J=8.9$  Hz, 1H; NH), 7.03–7.01 (m, 1H; CH), 6.97–6.88 (m, 1H; CH), 5.63 (bs, 1H; CH), 5.12 (dd,  $J=8.9, 2.7$  Hz, 1H; CH), 3.76 (s, 3H;  $CH_3$ ),  $^{13}C$  NMR (75 MHz,  $CDCl_3$ ) (*syn*):  $\delta=170.6, 167.9, 143.2, 133.6, 131.8, 128.5, 127.2, 126.6, 125.5, 124.7, 70.3, 58.1, 52.8$ , SFC : Chiralpak AD-H,  $scCO_2/MeOH$  80/20, 4 mL/min,  $P = 150$  bar,  $\lambda = 215$  nm,  $t_R$  [*syn*-(*R,R*)] = 3.02 min,  $t_R$  [*syn*-(*S,S*)] = 3.80 min (major),  $t_R$  [*anti*] = 5.32 min,  $t_R$  [*anti*] = 5.95 min.

# NMR and SFC/HPLC spectra of compounds 2a–2c and 2e–2k

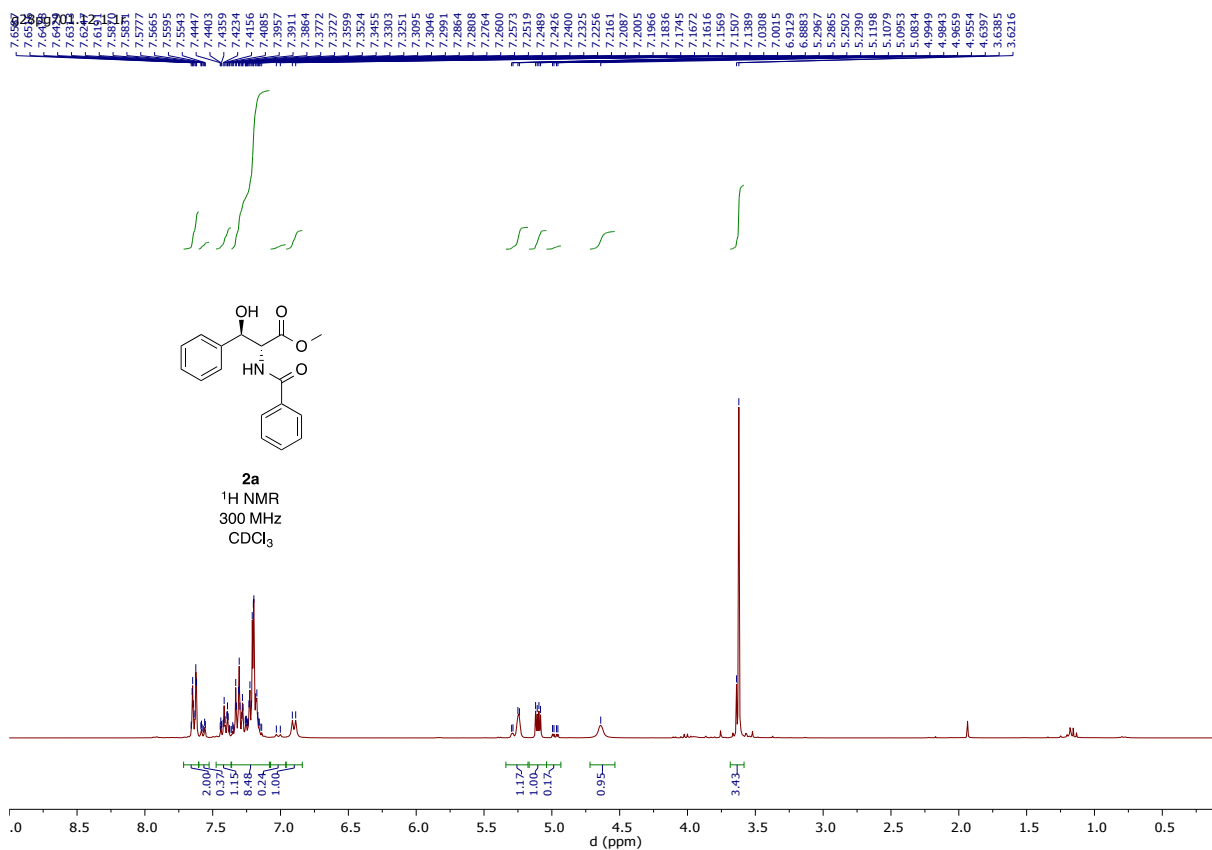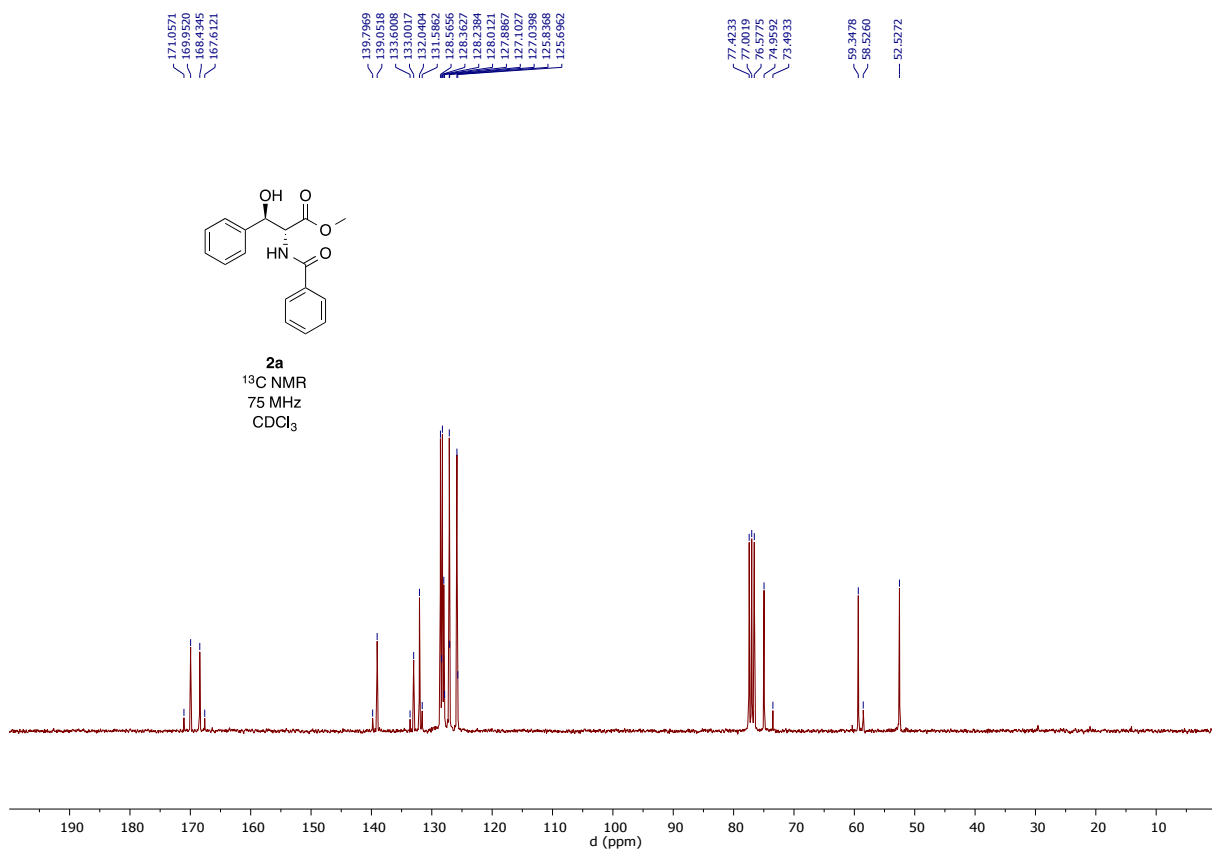

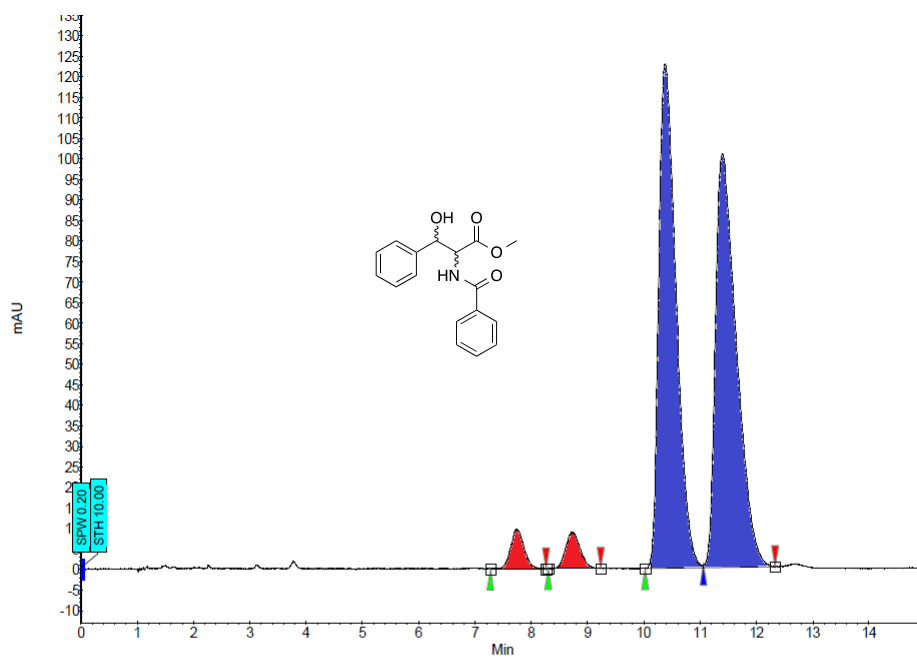

Results Table:

| Index | Name    | Start [Min] | Time [Min] | End [Min] | RT Offset [Min] | Quantity [% Area] | Height [μV] | Area [μV.Min] | Area [%] |
|-------|---------|-------------|------------|-----------|-----------------|-------------------|-------------|---------------|----------|
| 1     | UNKNOWN | 7.27        | 7.75       | 8.27      | 0.00            | 2.85              | 9.6         | 2.6           | 2.850    |
| 2     | UNKNOWN | 8.30        | 8.73       | 9.23      | 0.00            | 2.83              | 8.8         | 2.6           | 2.832    |
| 3     | UNKNOWN | 10.02       | 10.38      | 11.06     | 0.00            | 47.27             | 122.8       | 43.7          | 47.266   |
| 4     | UNKNOWN | 11.06       | 11.39      | 12.33     | 0.00            | 47.05             | 100.7       | 43.5          | 47.053   |
| Total |         |             |            |           |                 | 100.00            | 241.9       | 92.5          | 100.000  |

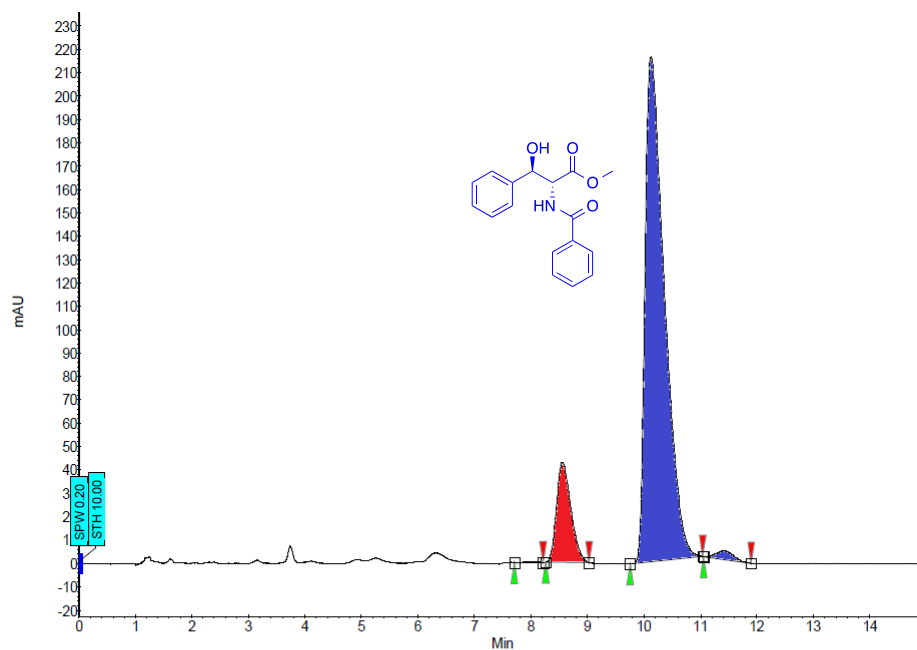

Results Table:

| Index | Name    | Start [Min] | Time [Min] | End [Min] | RT Offset [Min] | Quantity [% Area] | Height [μV] | Area [μV.Min] | Area [%] |
|-------|---------|-------------|------------|-----------|-----------------|-------------------|-------------|---------------|----------|
| 1     | UNKNOWN | 7.71        | 8.01       | 8.22      | 0.00            | 0.12              | 0.6         | 0.1           | 0.116    |
| 2     | UNKNOWN | 8.27        | 8.56       | 9.03      | 0.00            | 12.65             | 42.9        | 12.6          | 12.652   |
| 3     | UNKNOWN | 9.75        | 10.12      | 11.04     | 0.00            | 85.91             | 215.9       | 85.7          | 85.914   |
| 4     | UNKNOWN | 11.06       | 11.43      | 11.89     | 0.00            | 1.32              | 3.7         | 1.3           | 1.318    |
| Total |         |             |            |           |                 | 100.00            | 263.1       | 99.8          | 100.000  |

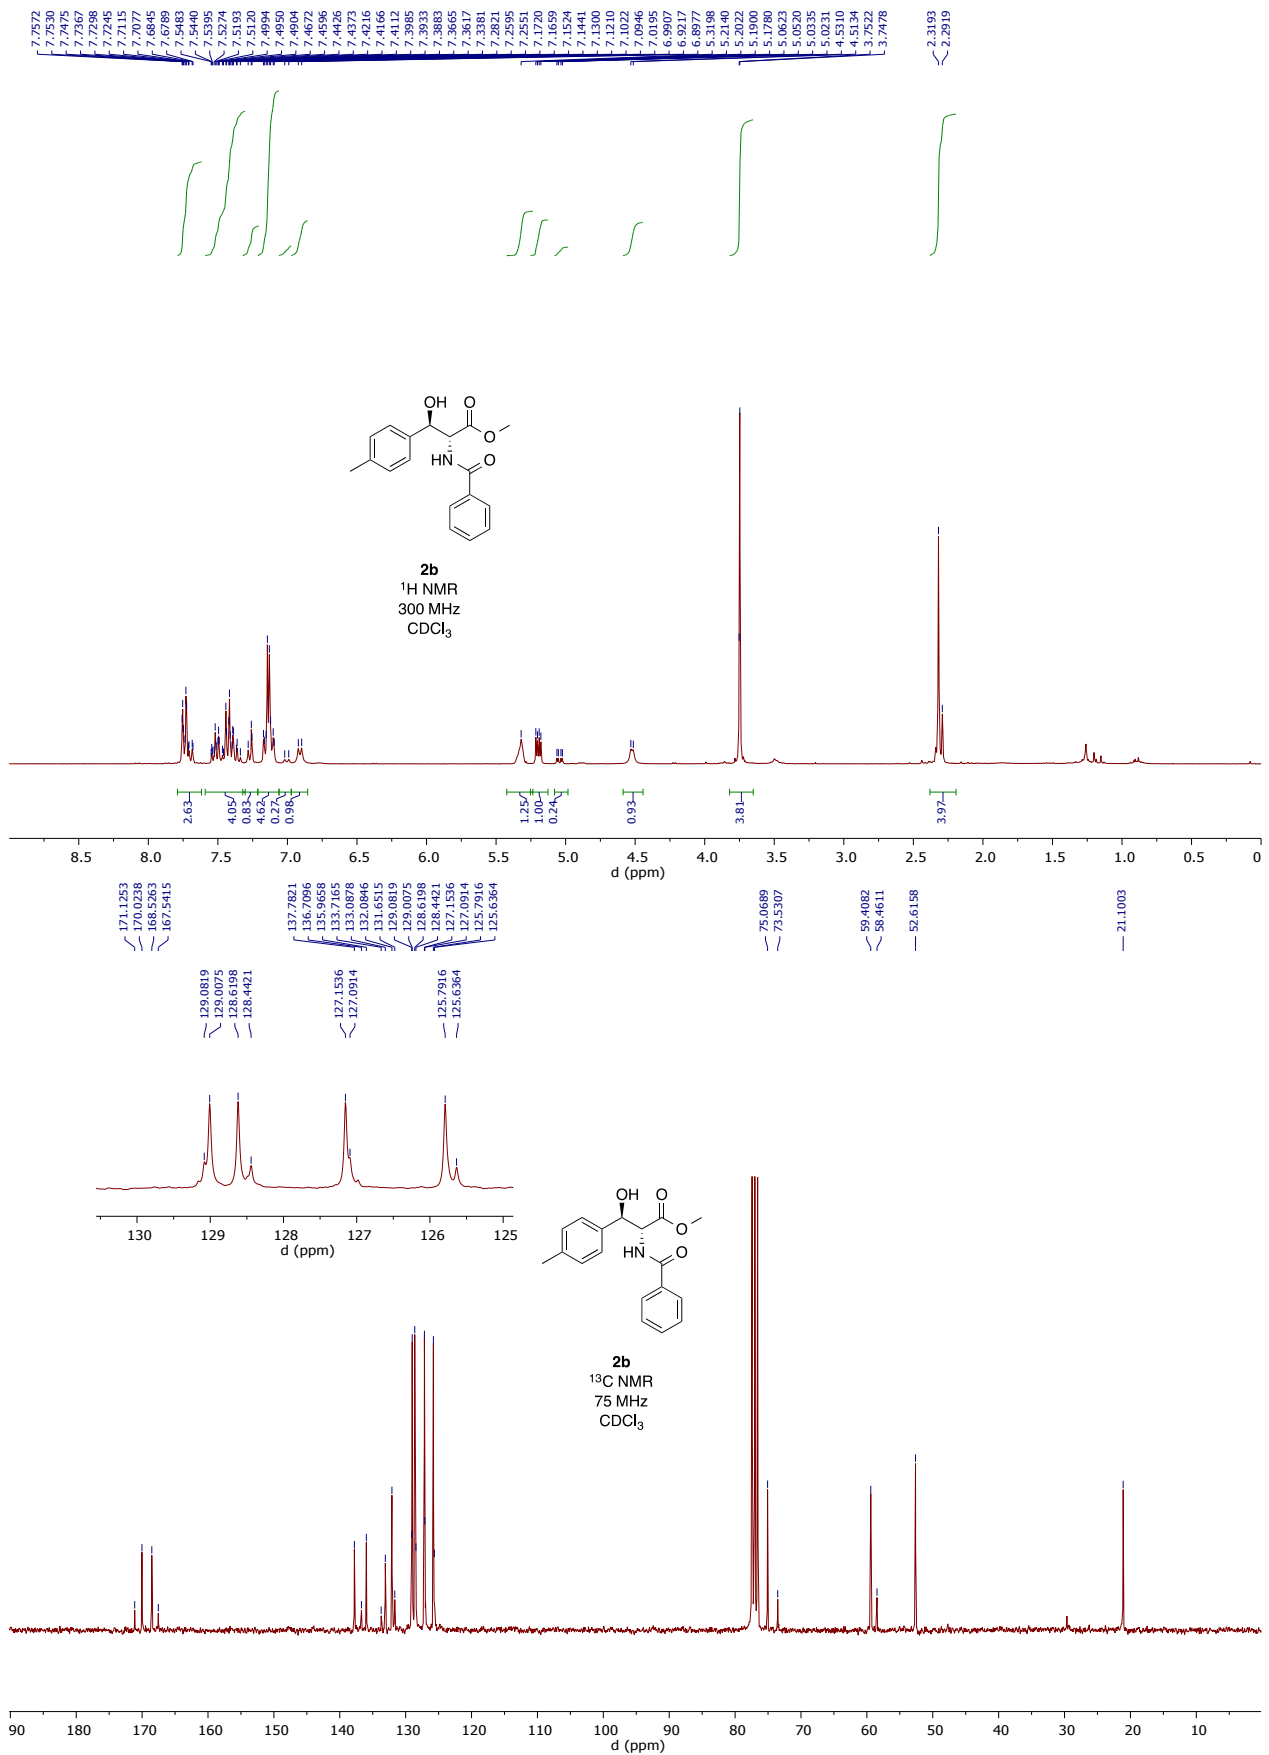



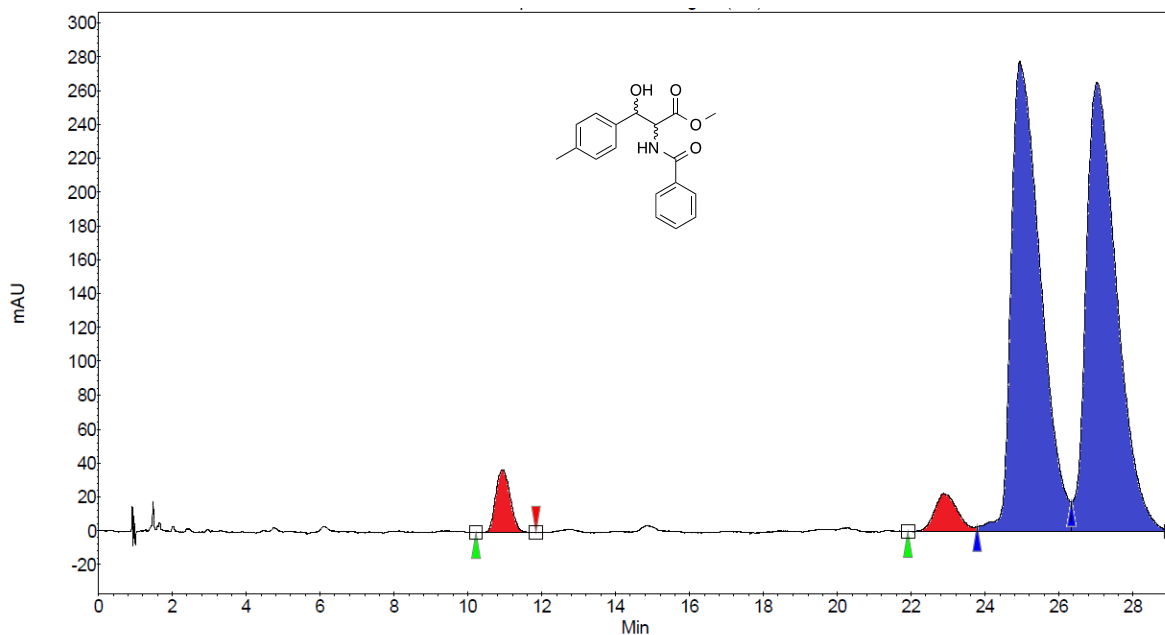

| Index | Name    | Time [Min] | Height [μV] | Area [μV.Min] | Area [%] | Selectivity | Res. HW |
|-------|---------|------------|-------------|---------------|----------|-------------|---------|
| 1     | UNKNOWN | 10.93      | 37.2        | 17.0          | 3.097    | 0.00        | 0.00    |
| 2     | UNKNOWN | 22.87      | 22.5        | 15.9          | 2.913    | 2.09        | 12.76   |
| 3     | UNKNOWN | 24.93      | 277.8       | 257.6         | 47.055   | 1.09        | 1.59    |
| 4     | UNKNOWN | 27.02      | 265.2       | 256.9         | 46.936   | 1.08        | 1.40    |
| Total |         |            | 602.8       | 547.4         | 100.000  |             |         |

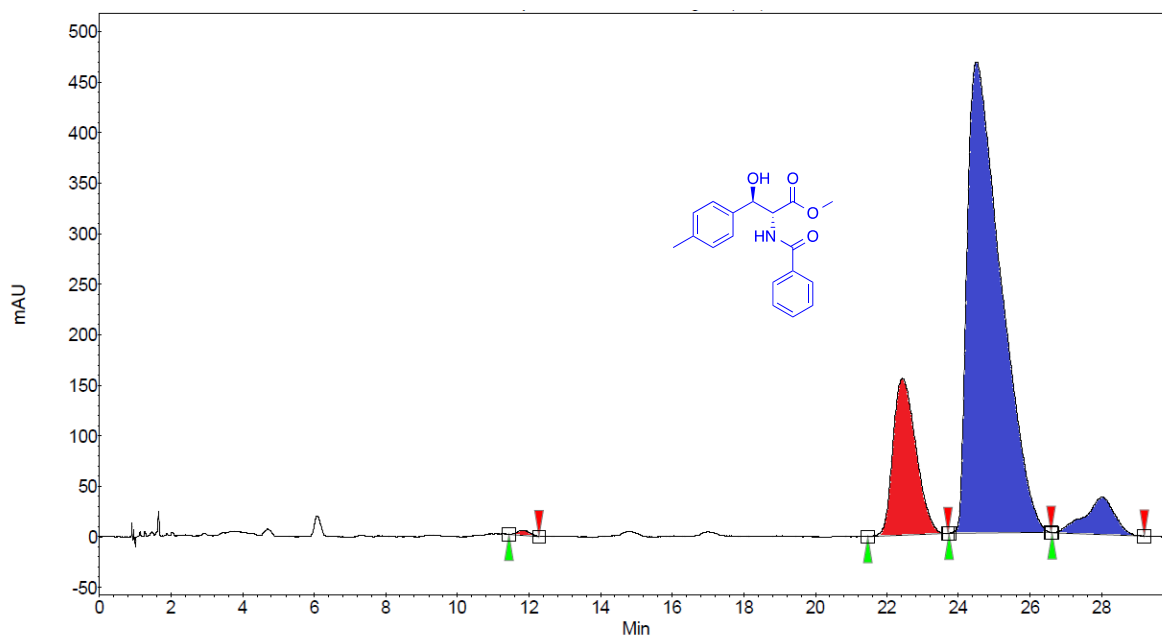

| Index | Name    | Time [Min] | Height [μV] | Area [μV.Min] | Area [%] | Selectivity | Res. HW |
|-------|---------|------------|-------------|---------------|----------|-------------|---------|
| 3     | UNKNOWN | 11.83      | 5.3         | 2.0           | 0.300    | 0.00        | 0.00    |
| 1     | UNKNOWN | 22.43      | 155.7       | 116.3         | 17.543   | 1.90        | 11.70   |
| 2     | UNKNOWN | 24.53      | 466.2       | 508.5         | 76.689   | 1.09        | 1.41    |
| 4     | UNKNOWN | 28.01      | 37.1        | 36.3          | 5.469    | 1.14        | 2.21    |
| Total |         |            | 664.4       | 663.0         | 100.000  |             |         |

7.6585  
7.6516  
7.6473  
7.6424  
7.6310  
7.6242  
7.6189  
7.5947  
7.5909  
7.5876  
7.5624  
7.4347  
7.4302  
7.4288  
7.4138  
7.4057  
7.3983  
7.3856  
7.3812  
7.3742  
7.3600  
7.3293  
7.3228  
7.3173  
7.3019  
7.2968  
7.2788  
7.2732  
7.2699  
7.2655  
7.2335  
7.2273  
7.2037  
7.1715  
7.1348  
7.1097  
7.0992  
7.0921  
7.0853  
7.0490  
7.0109  
7.0053  
6.9932  
6.9876  
6.9795  
6.9637  
6.9453  
6.9419  
6.9112  
6.8966  
5.9505  
5.2403  
5.1948  
5.0932  
5.0808  
5.0682  
5.0559  
4.9585  
4.9481  
4.9377  
4.9122  
4.5238  
3.6351  
3.6093  
2.2131  
2.1817

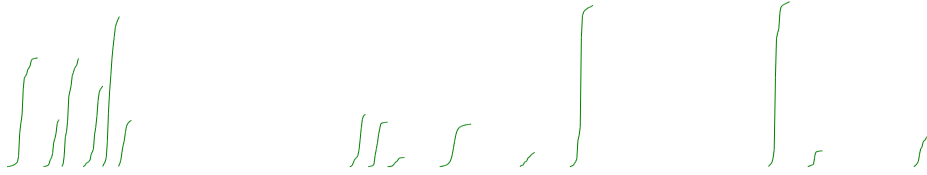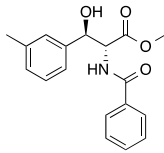

**2c**

<sup>1</sup>H NMR  
300 MHz  
CDCl<sub>3</sub>

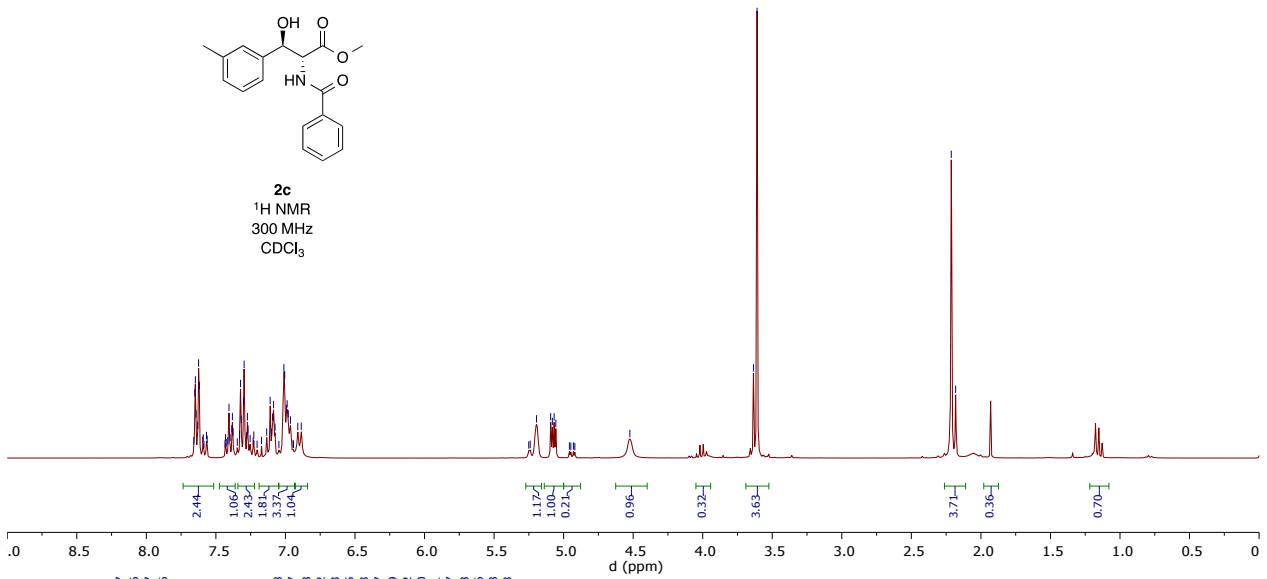

171.1127  
170.0436  
168.3197  
167.6436  
138.7547  
138.7546  
138.5222  
128.3250  
128.1111  
139.7748  
138.9987  
137.8378  
133.6762  
133.1203  
131.9695  
128.7547  
128.6239  
128.5222  
128.3250  
128.1111  
127.0737  
126.5288  
126.4166  
122.8998  
122.7233  
74.8697  
73.4602  
59.2692  
58.6060  
52.4024  
21.3234  
20.9129

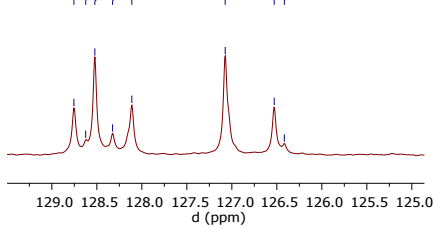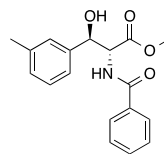

**2c**

<sup>13</sup>C NMR  
75 MHz  
CDCl<sub>3</sub>

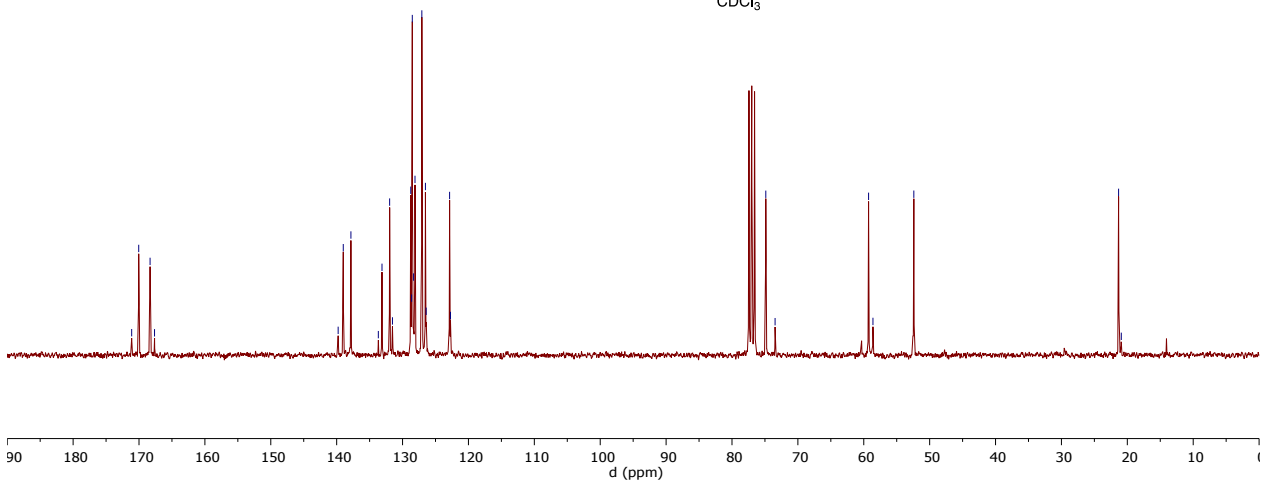

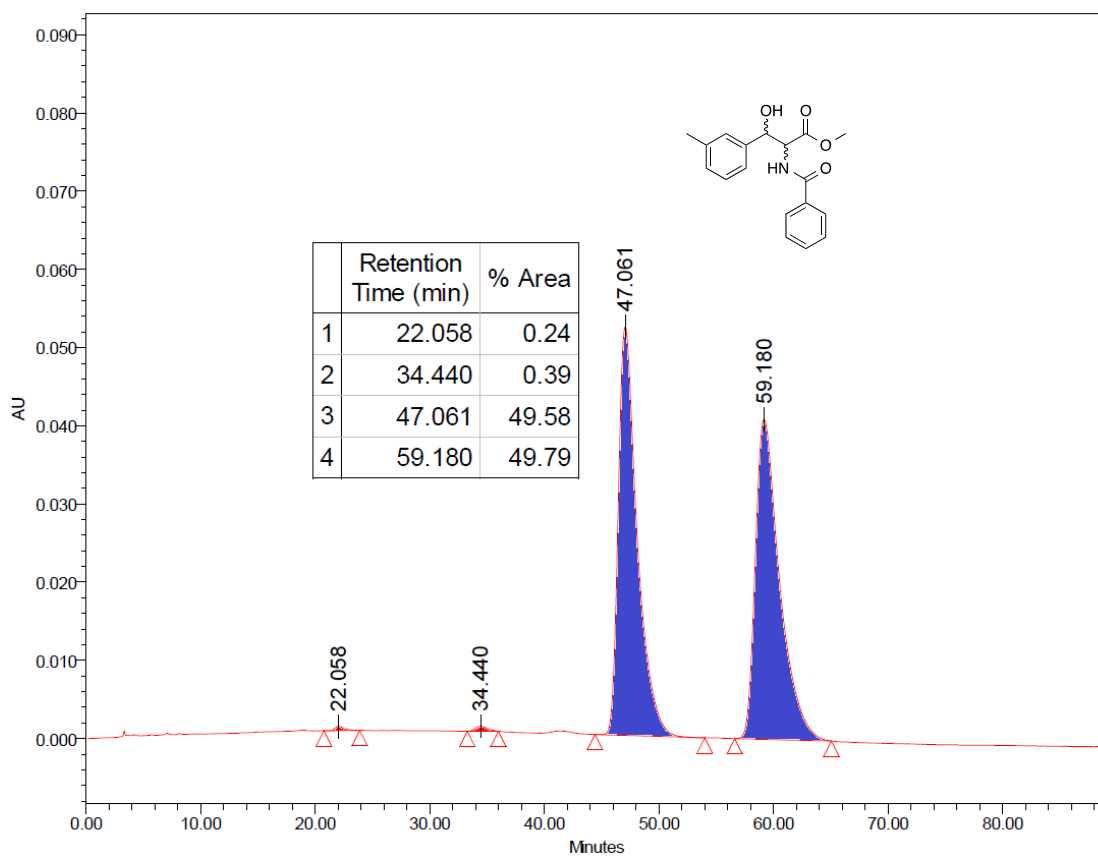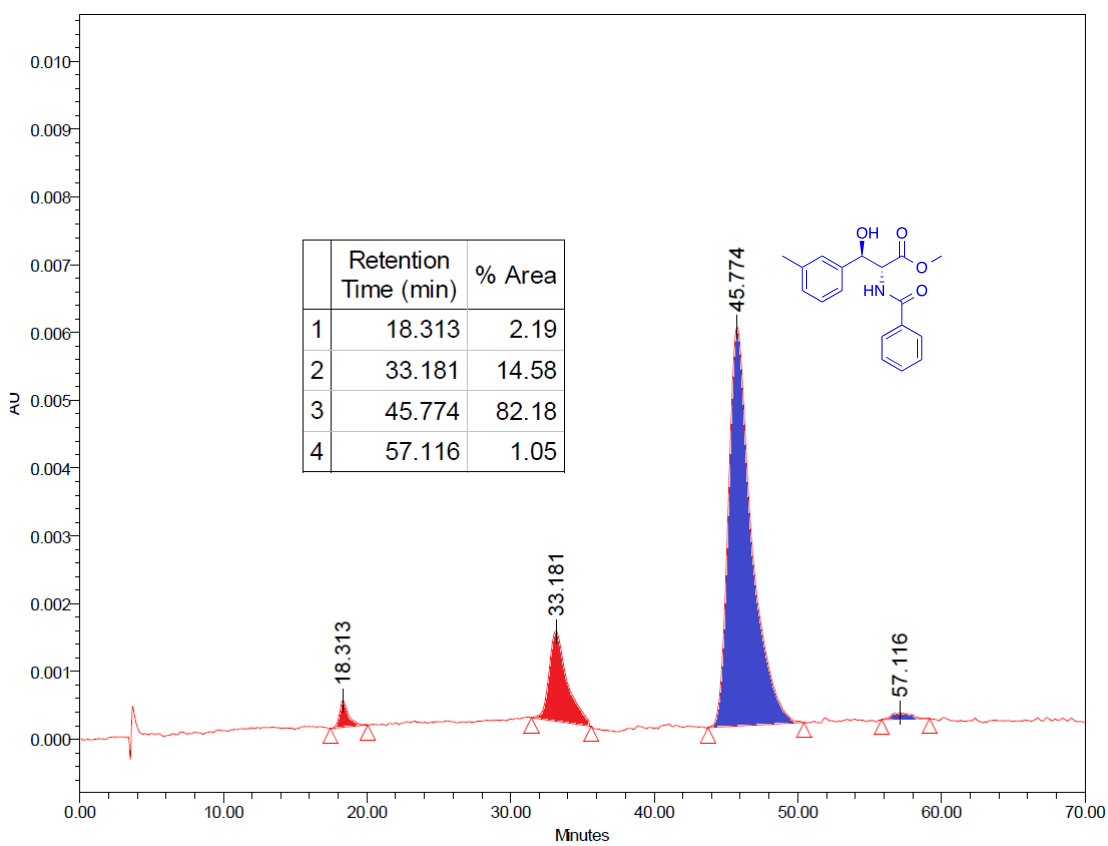

7.7404  
7.7338  
7.7232  
7.7160  
7.7103  
7.6983  
7.6815  
7.6744  
7.6683  
7.6616  
7.6544  
7.6215  
7.5107  
7.5023  
7.4947  
7.4824  
7.4775  
7.4724  
7.4572  
7.4494  
7.443  
7.4233  
7.4182  
7.4021  
7.3969  
7.3774  
7.3645  
7.3390  
7.3140  
7.3095  
7.3040  
7.2932  
7.2779  
7.2706  
7.2593  
7.2015  
7.1943  
7.1792  
7.1723  
7.0755  
6.966  
6.9485  
6.9235  
6.9018  
6.8569  
6.8462  
6.8388  
6.8246  
6.8173  
6.7962  
6.7817  
5.7255  
5.7255  
5.1632  
5.1512  
5.1390  
5.0362  
5.0252  
5.0074  
4.9963  
3.7846  
3.7846  
3.7240

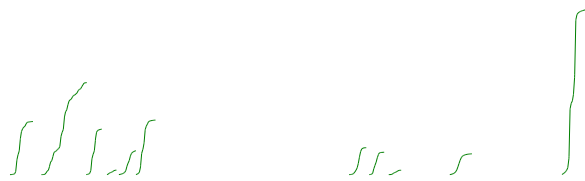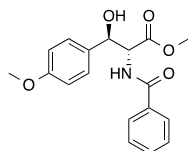

**2e**

<sup>1</sup>H NMR  
300 MHz  
CDCl<sub>3</sub>

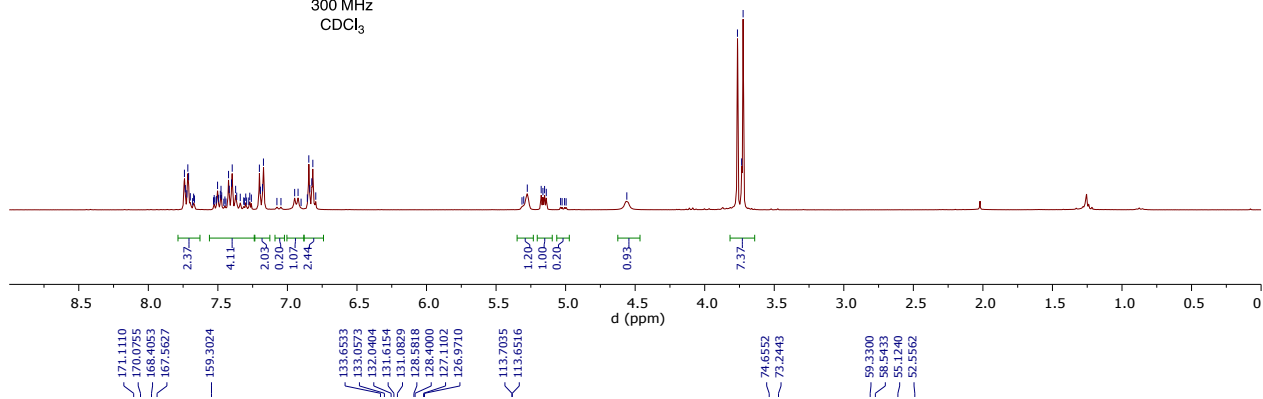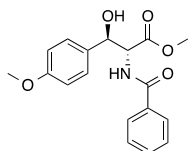

**2e**

<sup>13</sup>C NMR  
75 MHz  
CDCl<sub>3</sub>

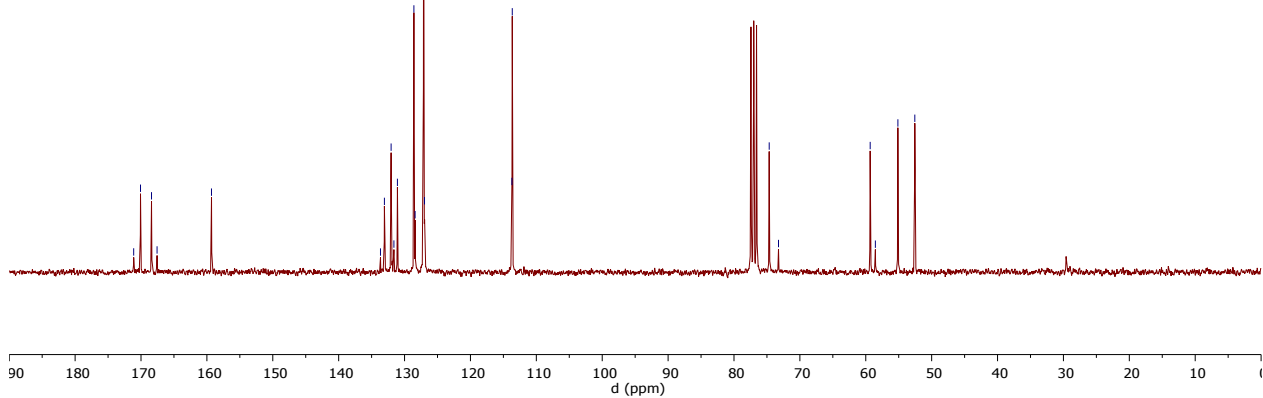

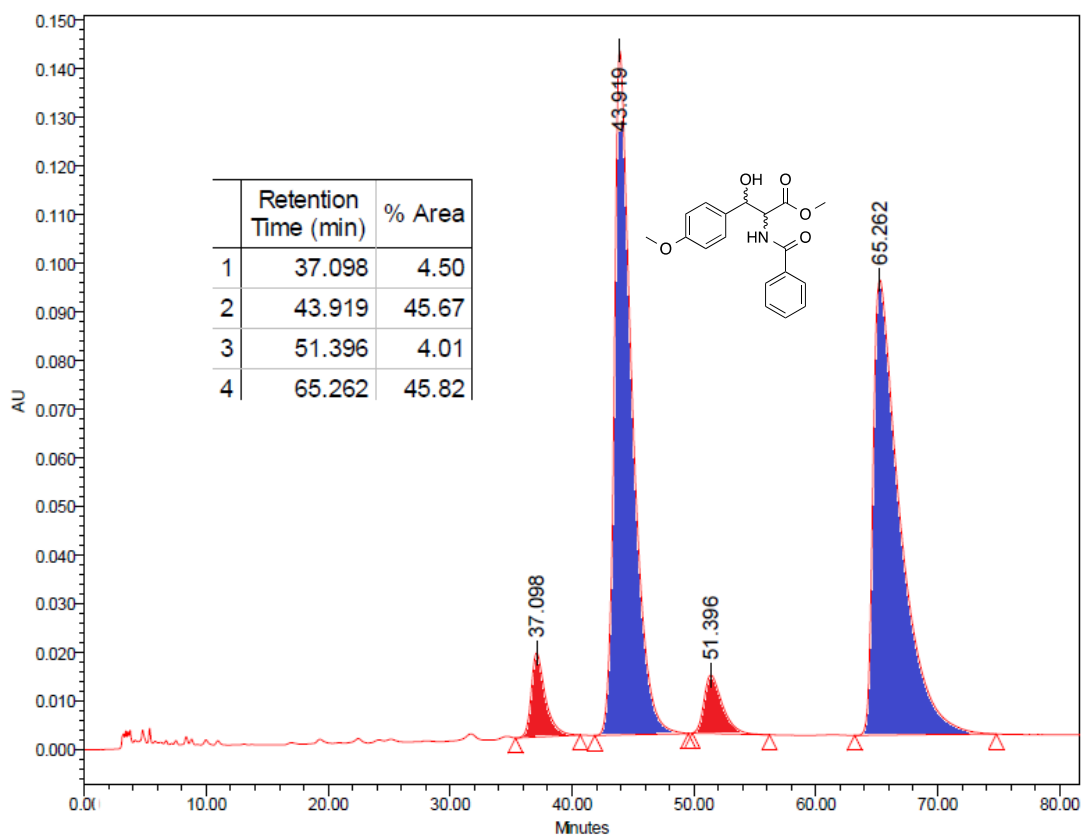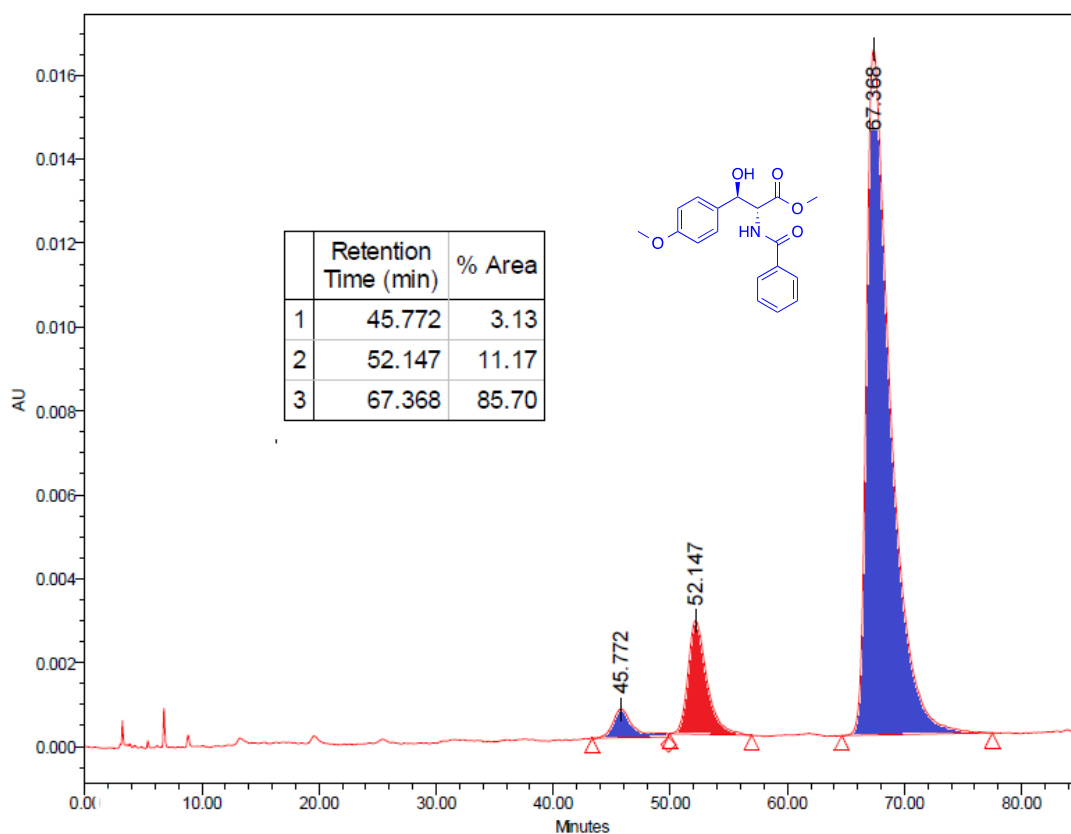

7.8598  
7.8459  
7.8337  
7.8230  
7.8085  
7.7967  
7.7805  
7.7520  
7.7270  
7.7214  
7.6884  
7.6626  
7.6385  
7.6328  
7.5362  
7.5312  
7.5148  
7.5070  
7.4988  
7.4856  
7.4758  
7.4647  
7.4540  
7.4428  
7.4326  
7.4162  
7.3948  
7.3706  
7.3645  
7.3398  
7.3146  
7.2956  
7.2895  
7.2800  
7.0659  
7.0522  
6.9870  
6.9584  
5.9420  
5.5288  
5.5151  
5.3151  
5.3036  
5.2911  
5.2799  
5.2662  
5.1958  
5.1776  
5.1671  
4.7619  
4.7442  
3.7571  
3.7332

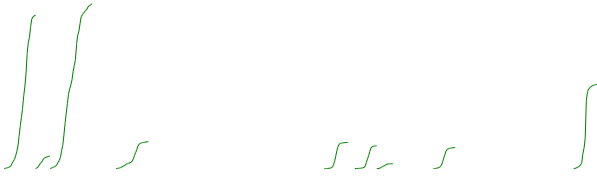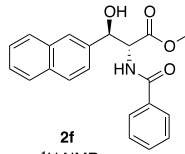

<sup>1</sup>H NMR  
300MHz  
CDCl<sub>3</sub>

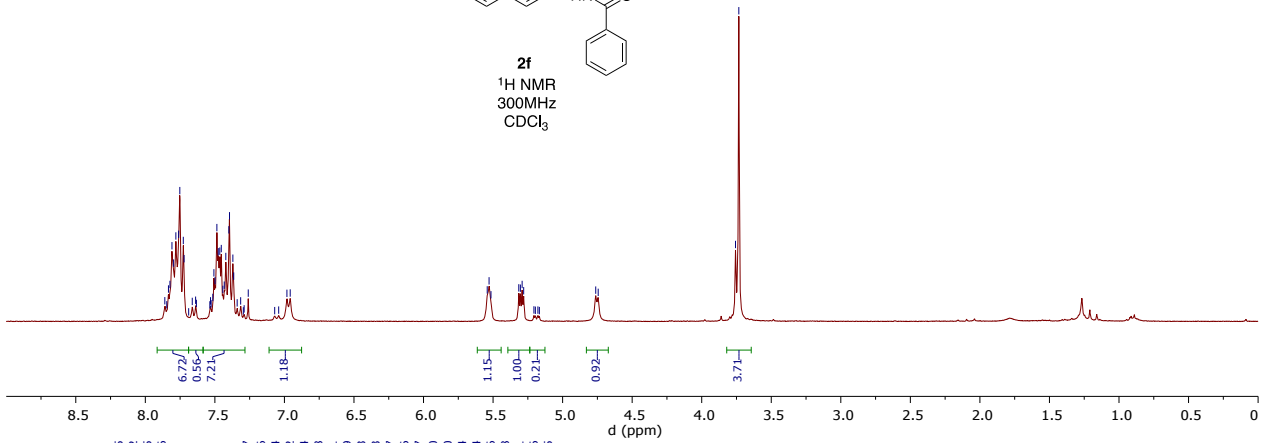

171.1015  
169.9112  
168.6565  
167.6796  
137.1817  
136.6026  
133.6184  
133.1282  
133.0634  
132.9838  
132.1591  
128.6533  
128.4343  
128.2797  
128.0746  
127.9867  
127.6570  
127.1520  
127.0504  
126.2014  
133.0634  
126.0536  
125.0348  
124.8351  
123.7406  
123.5845  
75.3609  
73.8204  
59.5279  
58.4364  
52.6857

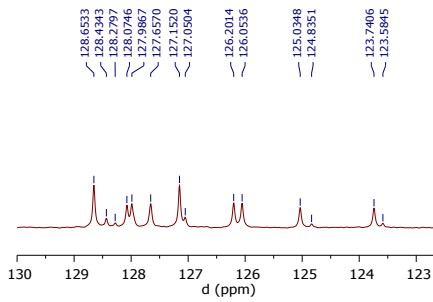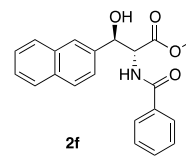

<sup>13</sup>C NMR  
75 MHz  
CDCl<sub>3</sub>

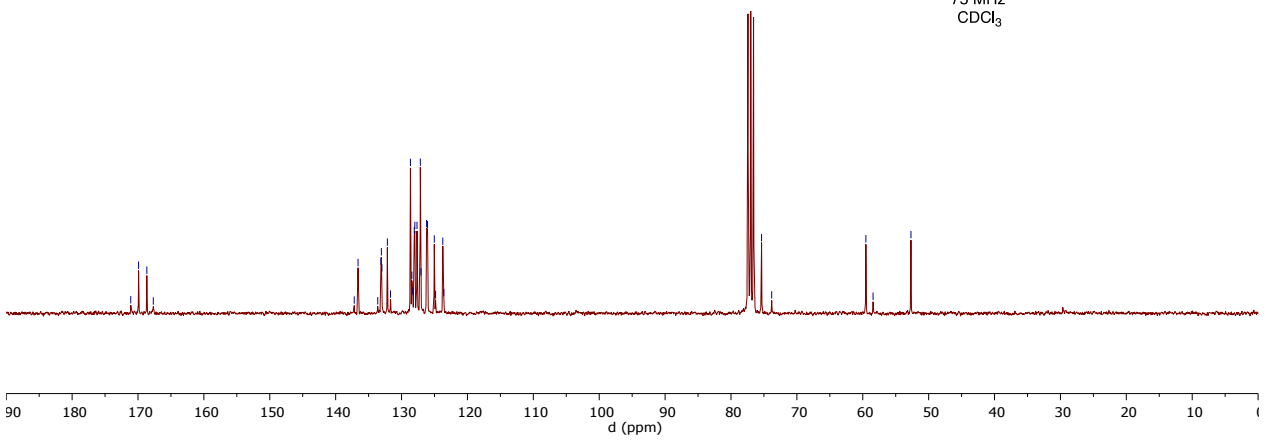

CCP27F1.tmp.DAT - Detector 1 Signal (UV)

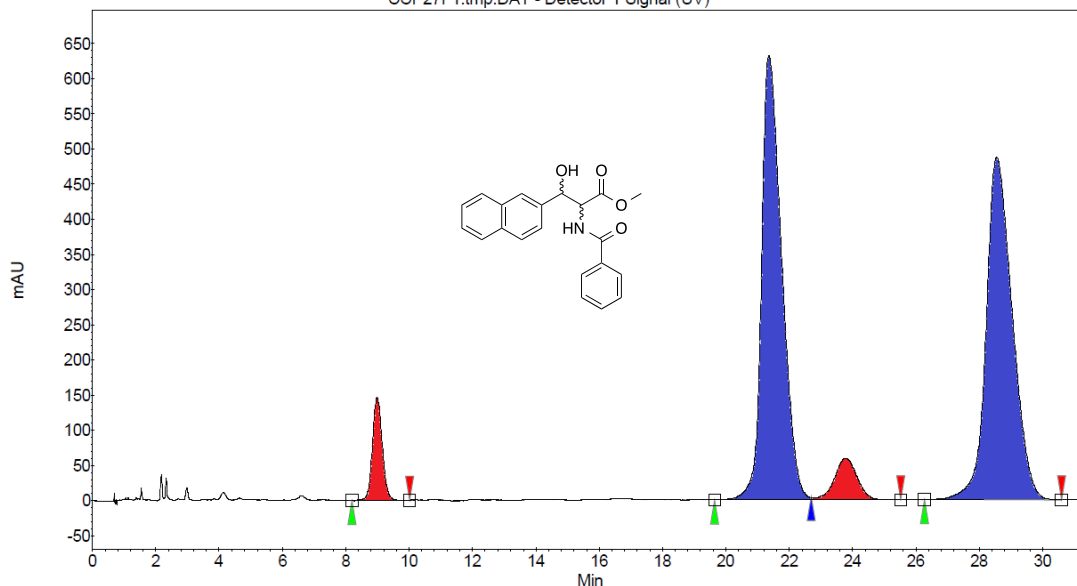

| Index | Name    | Time [Min] | Height [µV] | Area [µV.Min] | Area [%] | Selectivity | Res. HW |
|-------|---------|------------|-------------|---------------|----------|-------------|---------|
| 1     | UNKNOWN | 8.98       | 146.4       | 52.1          | 5.051    | 0.00        | 0.00    |
| 2     | UNKNOWN | 21.35      | 632.0       | 464.9         | 45.099   | 2.38        | 14.55   |
| 4     | UNKNOWN | 23.76      | 58.9        | 48.6          | 4.710    | 1.11        | 2.00    |
| 3     | UNKNOWN | 28.55      | 487.1       | 465.3         | 45.140   | 1.20        | 3.50    |
| Total |         |            | 1324.5      | 1030.8        | 100.000  |             |         |

CCP27FA.tmp.DAT - Detector 1 Signal (UV)

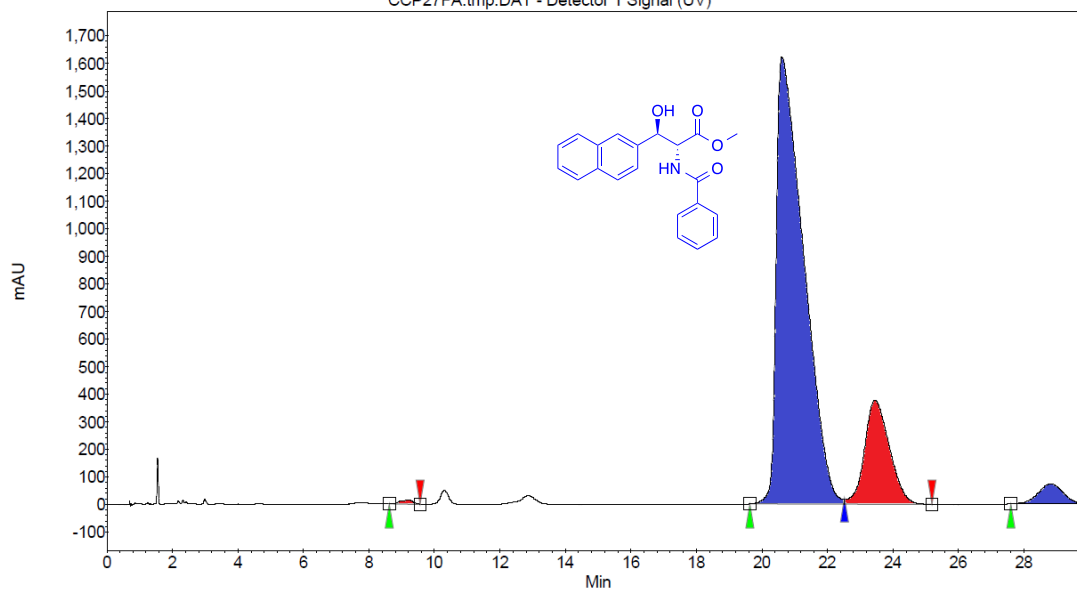

| Index | Name    | Time [Min] | Height [µV] | Area [µV.Min] | Area [%] | Selectivity | Res. HW |
|-------|---------|------------|-------------|---------------|----------|-------------|---------|
| 1     | UNKNOWN | 9.21       | 16.0        | 6.8           | 0.345    | 0.00        | 0.00    |
| 2     | UNKNOWN | 20.61      | 1622.5      | 1569.4        | 79.505   | 2.24        | 9.80    |
| 4     | UNKNOWN | 23.46      | 377.5       | 333.4         | 16.891   | 1.14        | 1.93    |
| 3     | UNKNOWN | 28.82      | 73.4        | 64.3          | 3.260    | 1.23        | 3.89    |
| Total |         |            | 2089.3      | 1973.9        | 100.000  |             |         |

7.6547  
7.6472  
7.6434  
7.6383  
7.6270  
7.6201  
7.6147  
7.5987  
7.5951  
7.5886  
7.5817  
7.5764  
7.4645  
7.4601  
7.4557  
7.4431  
7.4356  
7.4289  
7.4246  
7.4108  
7.4062  
7.3979  
7.3935  
7.3804  
7.3734  
7.3667  
7.3435  
7.3381  
7.3225  
7.3188  
7.2992  
7.2938  
7.2897  
7.2718  
7.2661  
7.2504  
7.2454  
7.2288  
7.2210  
7.2047  
7.1972  
7.1878  
7.1828  
7.1764  
7.1666  
7.1583  
7.1445  
7.1357  
7.1274  
7.1166  
7.1052  
7.0987  
7.0075  
6.9780  
6.9416  
6.9178  
5.2530  
5.2145  
5.0769  
5.0577  
5.0532  
5.0418  
4.9708  
4.9607  
4.9413  
4.9312  
4.8468  
4.8297  
3.6452  
3.6382

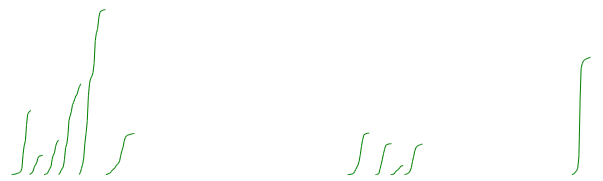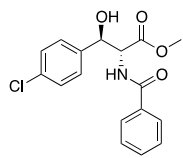

**2 g**  
<sup>1</sup>H NMR  
300MHz  
CDCl<sub>3</sub>

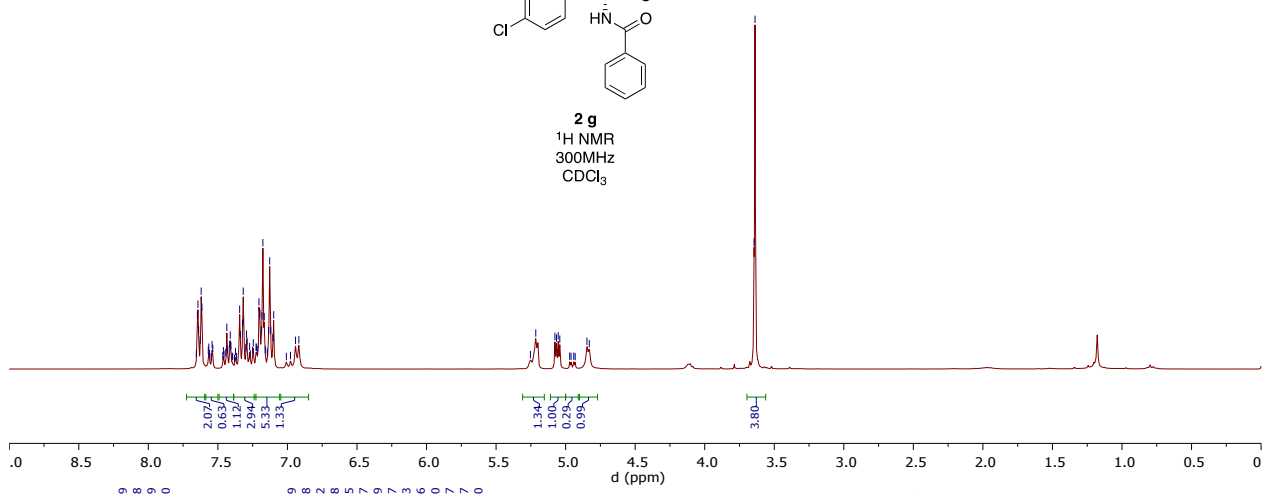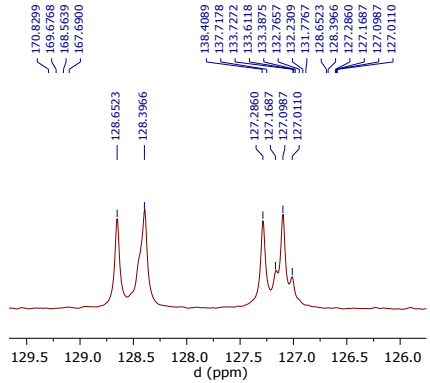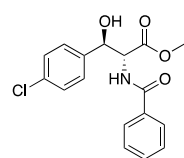

**2 g**  
<sup>13</sup>C NMR  
75 MHz  
CDCl<sub>3</sub>

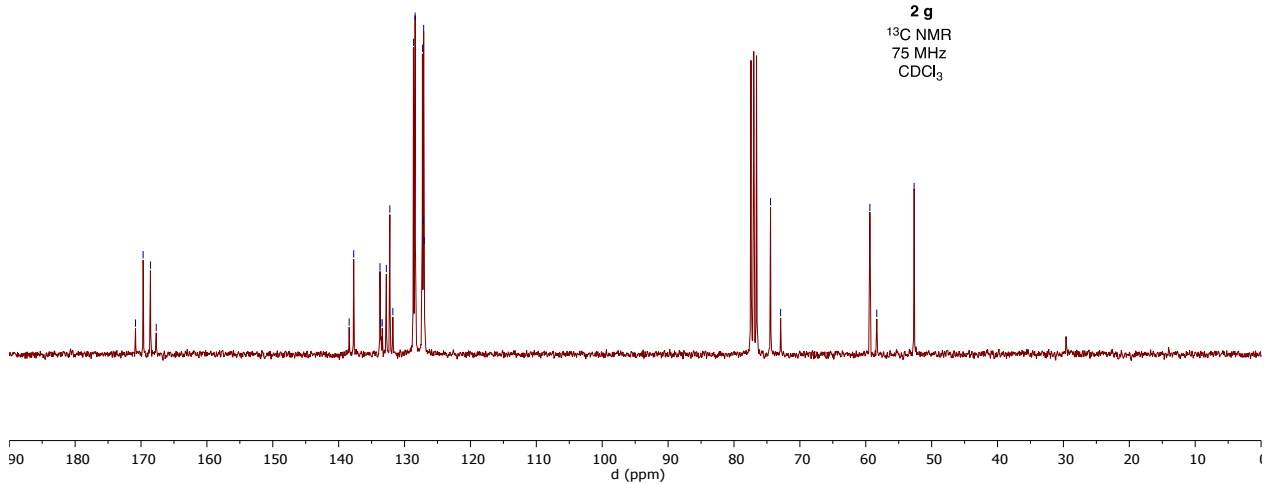



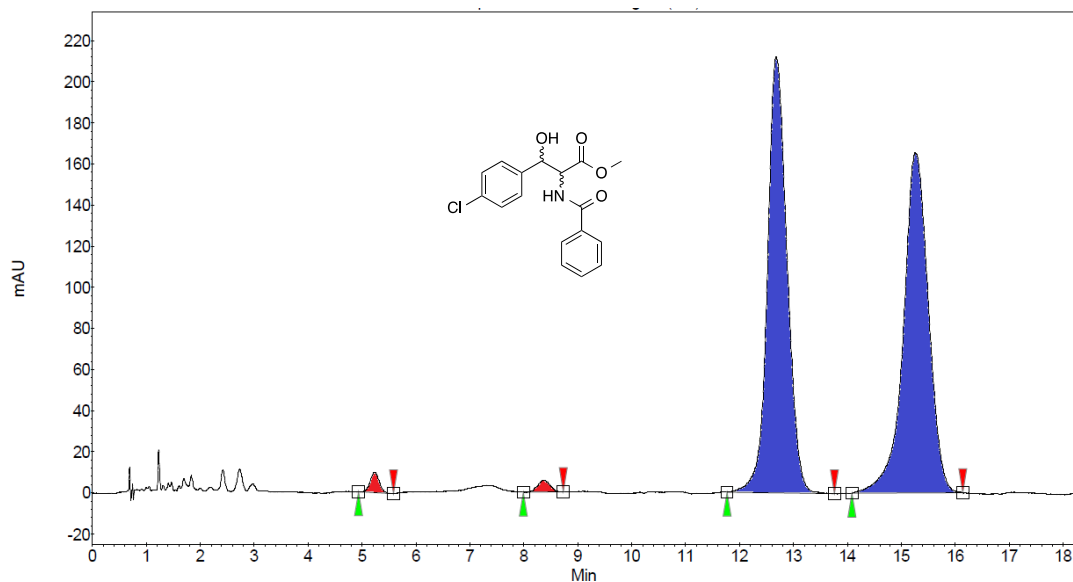

| Index | Name    | Time [Min] | Height [μV] | Area [μV.Min] | Area [%] | Selectivity | Res. HW |
|-------|---------|------------|-------------|---------------|----------|-------------|---------|
| 1     | UNKNOWN | 5.23       | 9.9         | 1.9           | 1.046    | 0.00        | 0.00    |
| 2     | UNKNOWN | 8.36       | 5.7         | 1.5           | 0.806    | 1.60        | 8.48    |
| 3     | UNKNOWN | 12.68      | 212.2       | 89.3          | 49.119   | 1.52        | 8.01    |
| 4     | UNKNOWN | 15.26      | 165.5       | 89.1          | 49.028   | 1.20        | 3.55    |
| Total |         |            | 393.3       | 181.8         | 100.000  |             |         |

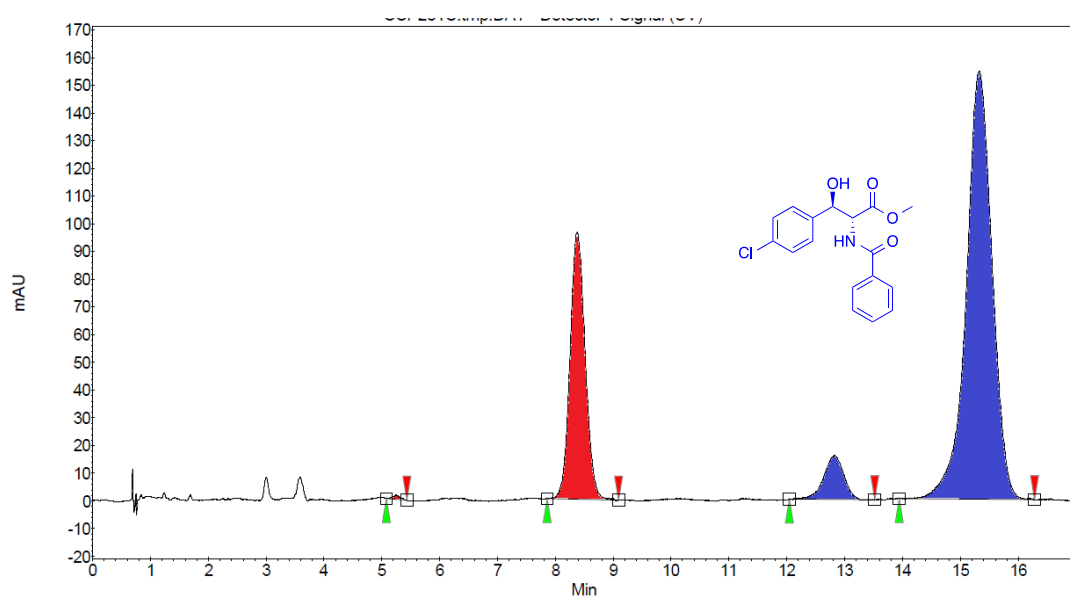

| Index | Name    | Time [Min] | Height [μV] | Area [μV.Min] | Area [%] | Selectivity | Res. HW |
|-------|---------|------------|-------------|---------------|----------|-------------|---------|
| 4     | UNKNOWN | 5.25       | 1.5         | 0.2           | 0.187    | 0.00        | 0.00    |
| 1     | UNKNOWN | 8.37       | 96.3        | 29.3          | 25.224   | 1.60        | 8.89    |
| 2     | UNKNOWN | 12.82      | 15.8        | 6.4           | 5.474    | 1.53        | 8.09    |
| 3     | UNKNOWN | 15.32      | 154.5       | 80.2          | 69.114   | 1.20        | 3.56    |
| Total |         |            | 268.0       | 116.1         | 100.000  |             |         |

7.6384  
7.6148  
7.6093  
7.5507  
7.5278  
7.5278  
7.4619  
7.4573  
7.4528  
7.4407  
7.4327  
7.4256  
7.4131  
7.4083  
7.4033  
7.4033  
7.3524  
7.3460  
7.3389  
7.3246  
7.3173  
7.3130  
7.2894  
7.2669  
7.2413  
7.2413  
7.1818  
7.1559  
7.1500  
7.1334  
7.1276  
7.0664  
7.0453  
7.0386  
7.0153  
6.9870  
6.9870  
6.9283  
5.2305  
5.1894  
5.0665  
5.0553  
5.0426  
5.0312  
4.8644  
4.8644

3.6294  
3.6310

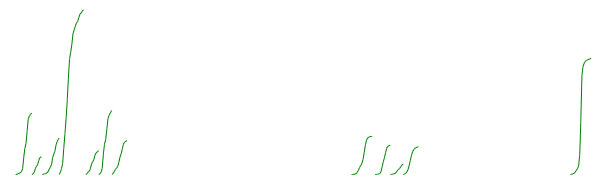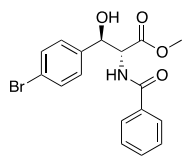

**2h**  
1H NMR  
300MHz  
CDCl<sub>3</sub>

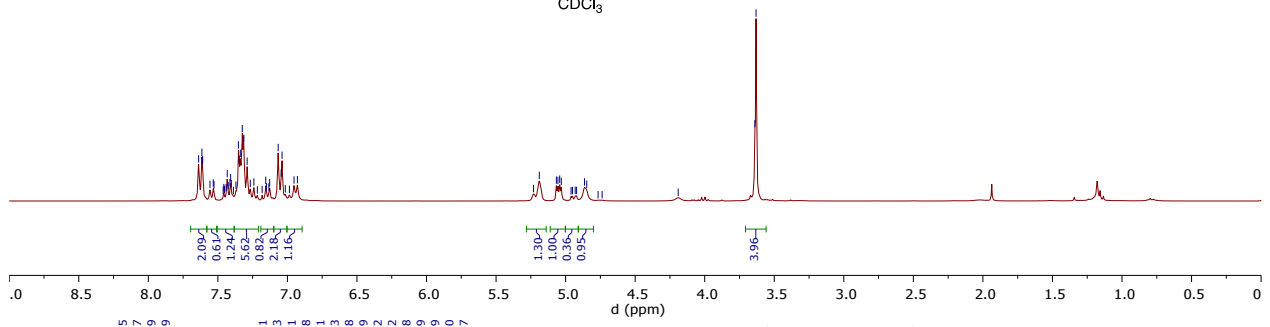

170.7905  
169.6427  
168.5359  
167.7109  
133.3511  
132.7438  
132.2251  
131.7783  
131.3168  
138.9561  
138.2543  
133.3511  
132.7438  
132.2251  
131.7783  
131.3168  
128.6429  
128.4452  
127.6112  
127.4938  
127.0899  
126.9999  
121.8960  
121.7717

74.4474  
72.9079  
59.3026  
58.2649  
52.6504

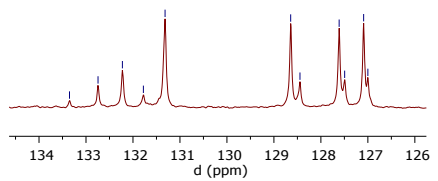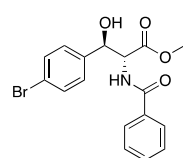

**2h**  
13C NMR  
75 MHz  
CDCl<sub>3</sub>

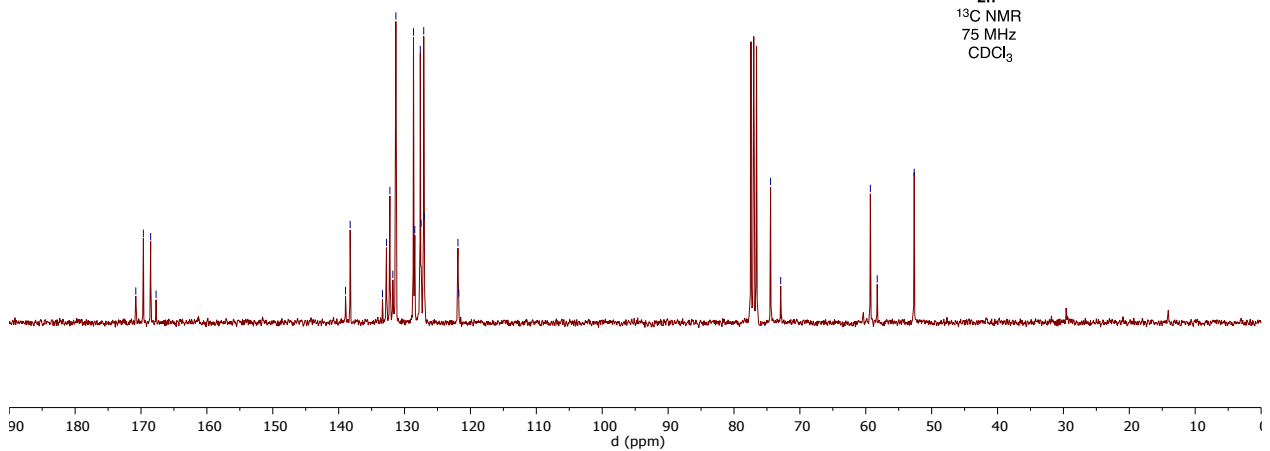

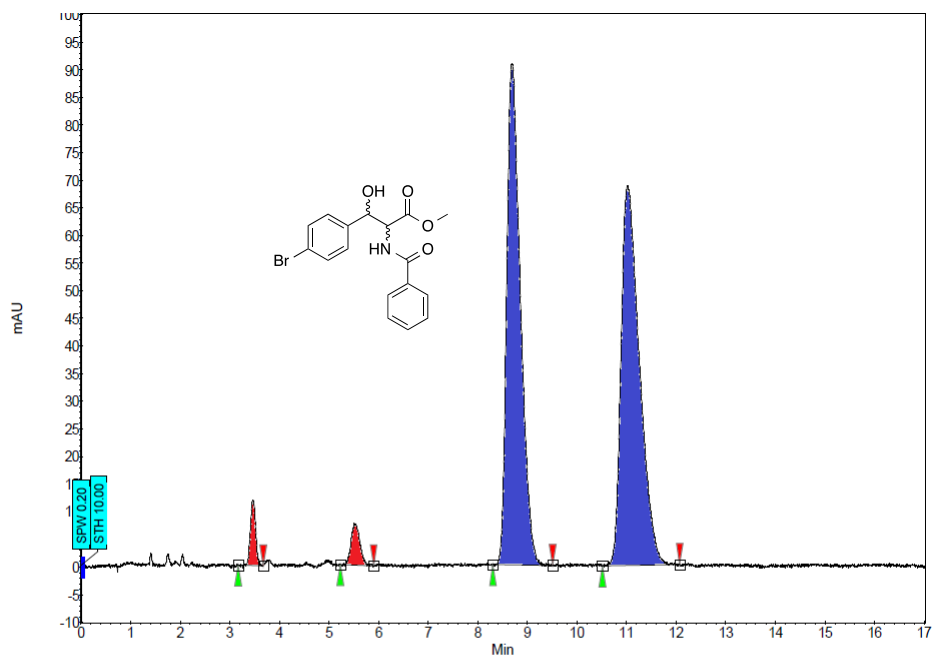

**Results Table:**

| Index        | Name    | Start [Min] | Time [Min] | End [Min] | RT Offset [Min] | Quantity [% Area] | Height [μV]  | Area [μV.Min] | Area [%]       |
|--------------|---------|-------------|------------|-----------|-----------------|-------------------|--------------|---------------|----------------|
| 4            | UNKNOWN | 3.17        | 3.46       | 3.68      | 0.00            | 2.34              | 11.9         | 1.4           | 2.343          |
| 3            | UNKNOWN | 5.23        | 5.53       | 5.90      | 0.00            | 2.47              | 7.4          | 1.5           | 2.475          |
| 2            | UNKNOWN | 8.31        | 8.68       | 9.50      | 0.00            | 47.33             | 90.7         | 29.1          | 47.327         |
| 1            | UNKNOWN | 10.51       | 11.02      | 12.07     | 0.00            | 47.86             | 68.7         | 29.4          | 47.855         |
| <b>Total</b> |         |             |            |           |                 | <b>100.00</b>     | <b>178.6</b> | <b>61.4</b>   | <b>100.000</b> |

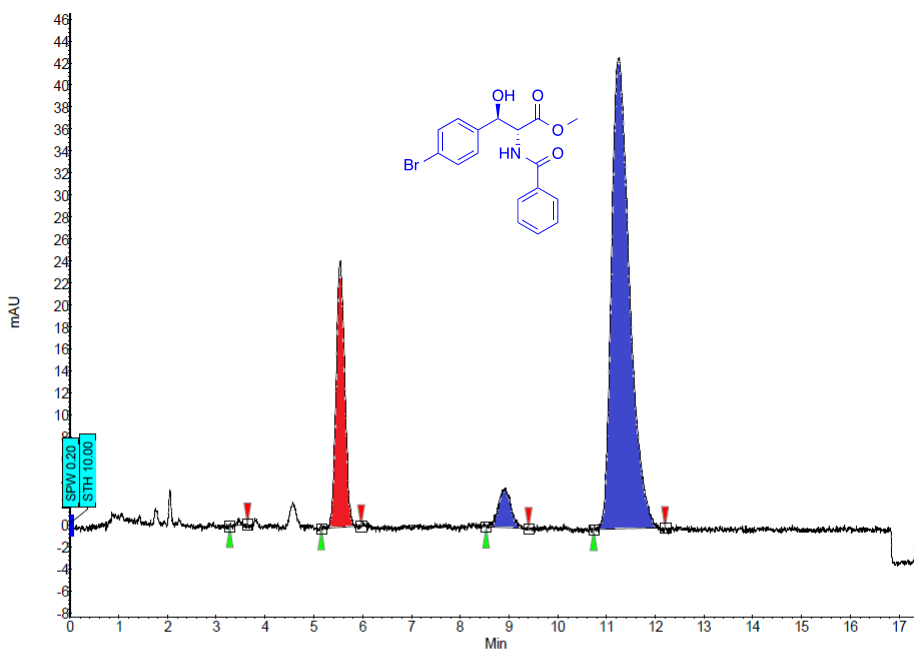

**Results Table:**

| Index        | Name    | Start [Min] | Time [Min] | End [Min] | RT Offset [Min] | Quantity [% Area] | Height [μV] | Area [μV.Min] | Area [%]       |
|--------------|---------|-------------|------------|-----------|-----------------|-------------------|-------------|---------------|----------------|
| 1            | UNKNOWN | 3.27        | 3.47       | 3.63      | 0.00            | 0.11              | 0.6         | 0.0           | 0.107          |
| 2            | UNKNOWN | 5.15        | 5.53       | 5.96      | 0.00            | 20.28             | 24.1        | 5.0           | 20.284         |
| 3            | UNKNOWN | 8.53        | 8.92       | 9.40      | 0.00            | 4.30              | 3.6         | 1.1           | 4.302          |
| 4            | UNKNOWN | 10.73       | 11.24      | 12.20     | 0.00            | 75.31             | 42.7        | 18.5          | 75.307         |
| <b>Total</b> |         |             |            |           |                 | <b>100.00</b>     | <b>71.0</b> | <b>24.5</b>   | <b>100.000</b> |

7.6645  
7.6575  
7.6534  
7.6484  
7.6373  
7.6302  
7.6248  
7.5923  
7.5894  
7.5870  
7.5777  
7.5596  
7.4694  
7.4605  
7.4480  
7.4404  
7.4334  
7.4156  
7.4109  
7.4059  
7.3814  
7.3601  
7.3529  
7.3475  
7.3317  
7.3269  
7.3215  
7.3177  
7.3031  
7.2990  
7.2862  
7.2803  
7.2642  
7.2603  
7.2513  
7.2395  
7.2338  
7.2176  
7.1895  
7.1751  
7.1645  
7.1542  
7.1428  
7.1358  
7.1256  
6.9919  
6.9632  
6.9497  
6.9377  
6.9327  
6.9111  
6.8888  
6.8824  
6.8721  
6.8618  
6.8549  
5.2724  
5.2619  
5.2490  
5.2310  
5.0922  
5.0805  
5.0686  
5.0566  
4.9763  
4.9656  
4.9468  
4.9363  
3.6509

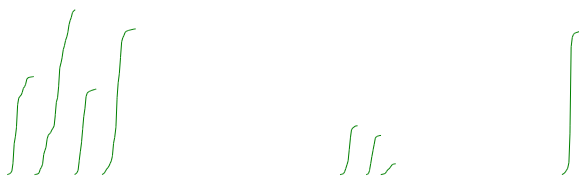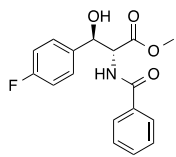

**2j**  
<sup>1</sup>H NMR  
300 MHz  
CDCl<sub>3</sub>

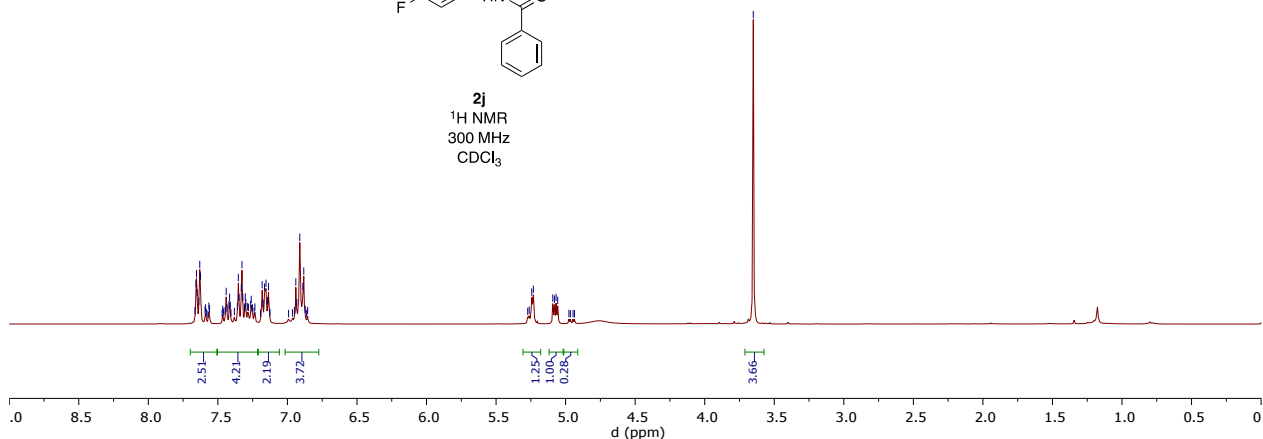

170.9194  
168.8058  
167.6396  
167.6396  
164.0347  
160.7718  
135.6043  
135.5799  
134.9174  
134.8775  
133.8775  
133.8377  
132.2234  
131.7707  
128.6649  
128.4718  
127.6493  
127.5413  
127.4288  
127.1053  
127.0262  
115.0242  
74.5156  
73.0614  
59.4392  
58.4697  
52.6690

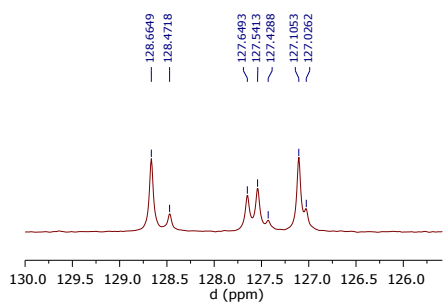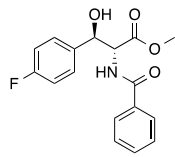

**2j**  
<sup>13</sup>C NMR  
75 MHz  
CDCl<sub>3</sub>

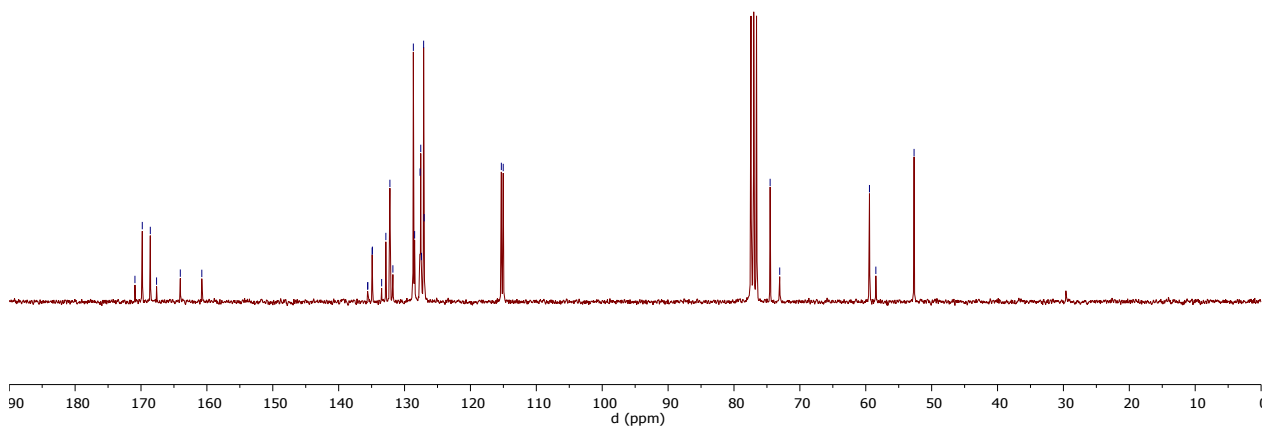

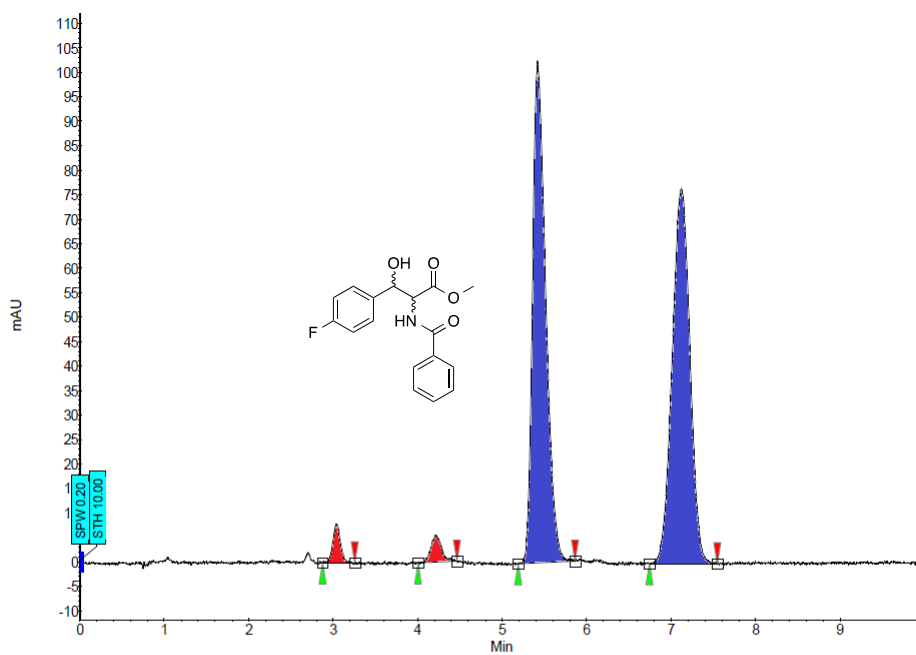

Results Table:

| Index | Name    | Start Time | End   | RT Offset | Quantity | Height   | Area  | Area     |         |
|-------|---------|------------|-------|-----------|----------|----------|-------|----------|---------|
|       |         | [Min]      | [Min] | [Min]     | [Min]    | [% Area] | [μV]  | [μV.Min] | [%]     |
| 1     | UNKNOWN | 2.87       | 3.04  | 3.26      | 0.00     | 2.10     | 7.8   | 0.8      | 2.096   |
| 2     | UNKNOWN | 4.00       | 4.22  | 4.47      | 0.00     | 1.97     | 5.5   | 0.8      | 1.971   |
| 3     | UNKNOWN | 5.19       | 5.42  | 5.86      | 0.00     | 47.91    | 102.4 | 18.7     | 47.912  |
| 4     | UNKNOWN | 6.74       | 7.12  | 7.55      | 0.00     | 48.02    | 76.7  | 18.7     | 48.020  |
| Total |         |            |       |           |          | 100.00   | 192.3 | 39.0     | 100.000 |

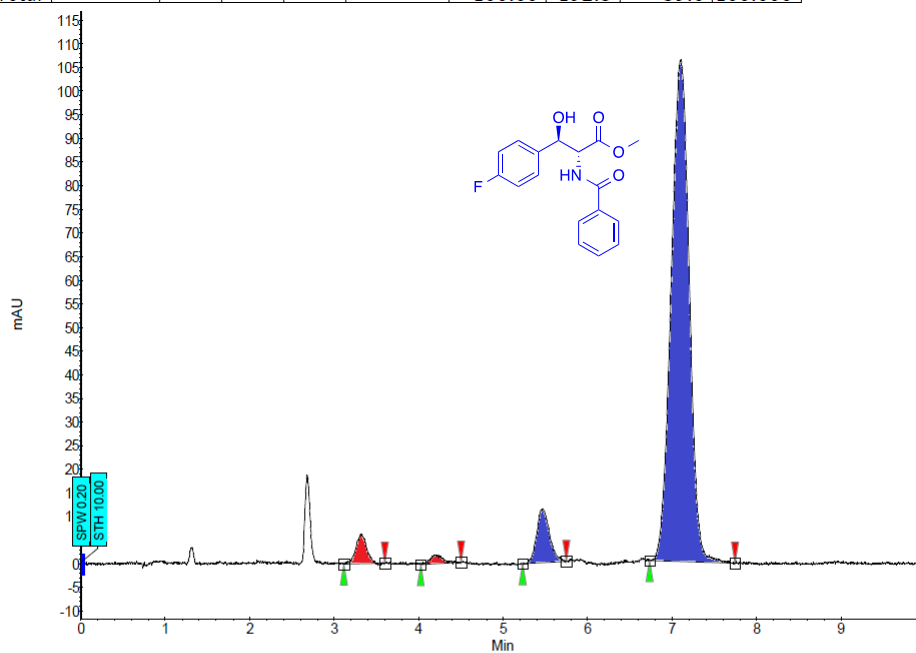

Results Table:

| Index | Name    | Start Time | End   | RT Offset | Quantity | Height   | Area  | Area     |         |
|-------|---------|------------|-------|-----------|----------|----------|-------|----------|---------|
|       |         | [Min]      | [Min] | [Min]     | [Min]    | [% Area] | [μV]  | [μV.Min] | [%]     |
| 4     | UNKNOWN | 3.11       | 3.31  | 3.60      | 0.00     | 2.99     | 6.1   | 0.9      | 2.985   |
| 3     | UNKNOWN | 4.02       | 4.20  | 4.50      | 0.00     | 1.01     | 1.6   | 0.3      | 1.008   |
| 2     | UNKNOWN | 5.23       | 5.46  | 5.75      | 0.00     | 6.78     | 11.3  | 2.0      | 6.775   |
| 1     | UNKNOWN | 6.73       | 7.10  | 7.74      | 0.00     | 89.23    | 106.1 | 26.5     | 89.232  |
| Total |         |            |       |           |          | 100.00   | 125.1 | 29.7     | 100.000 |

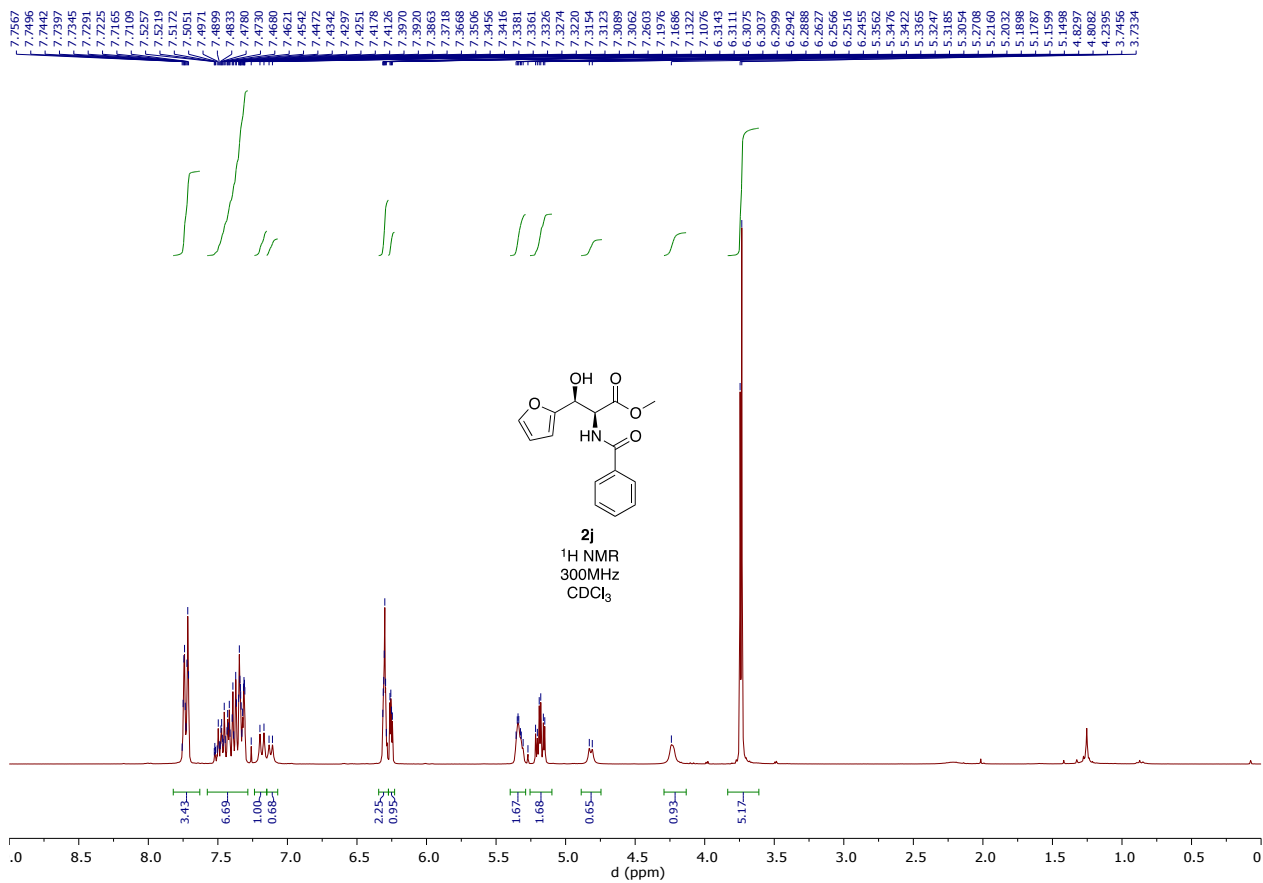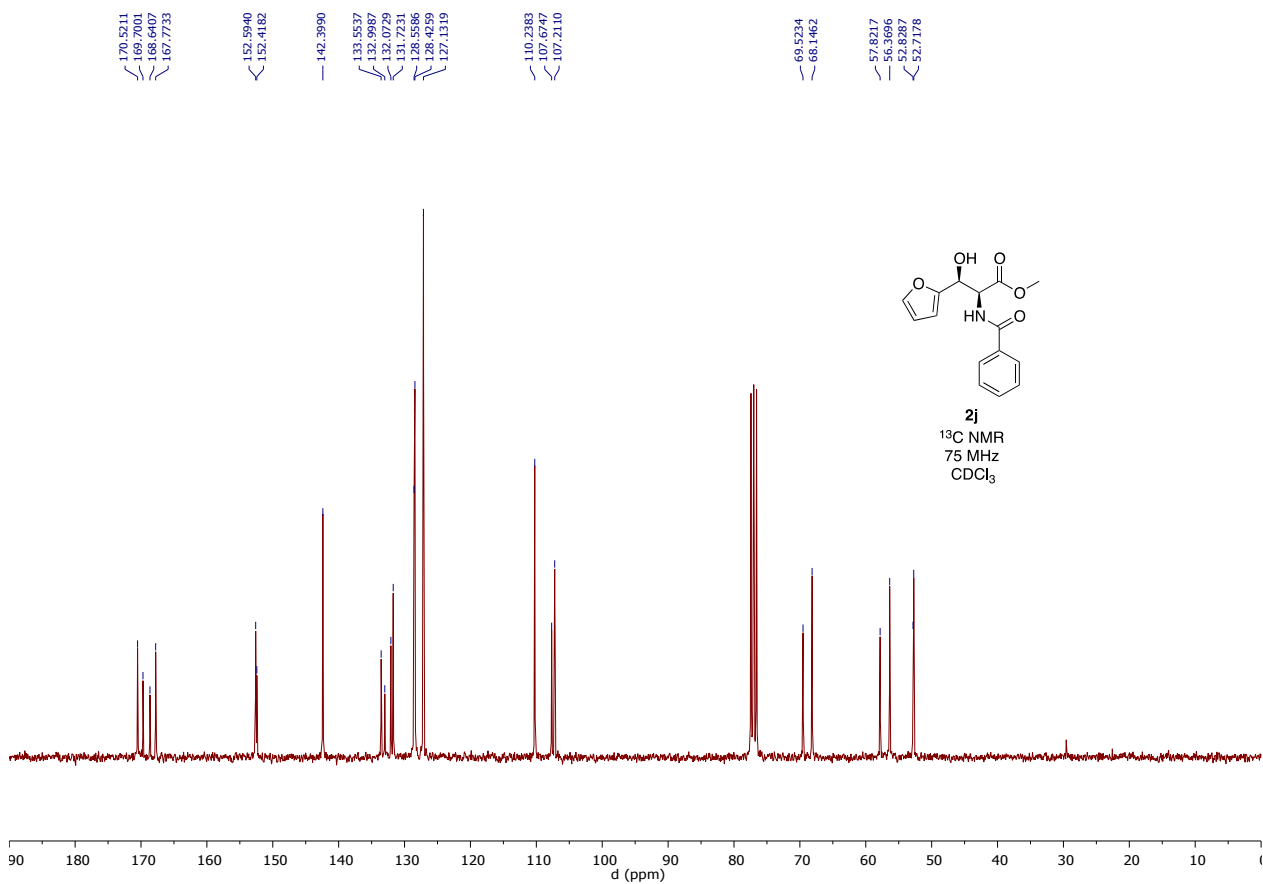

Measure of the enantiomeric excess for the *anti* compound :

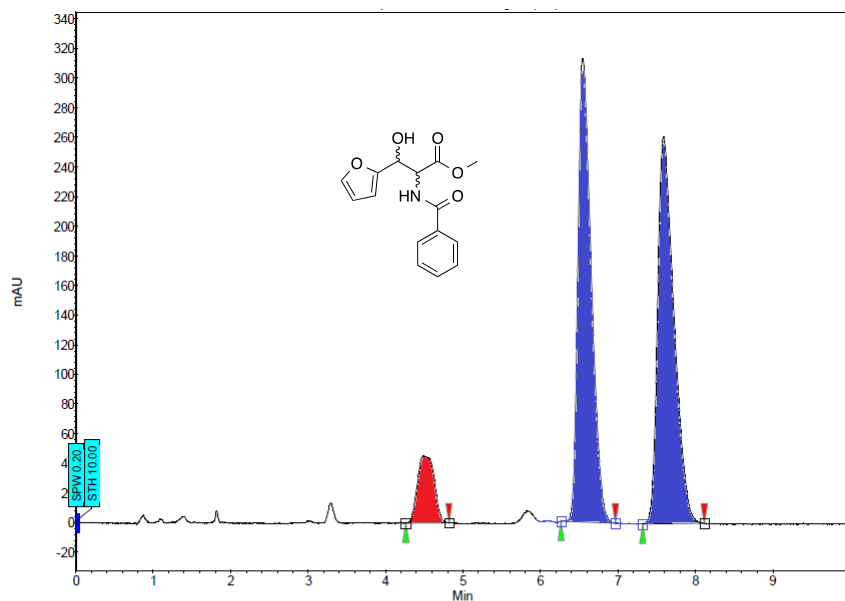

Results Table:

| Index | Name    | Start [Min] | Time [Min] | End [Min] | RT Offset [Min] | Quantity [% Area] | Height [μV] | Area [μV.Min] | Area [%] |
|-------|---------|-------------|------------|-----------|-----------------|-------------------|-------------|---------------|----------|
| 1     | UNKNOWN | 4.26        | 4.49       | 4.82      | 0.00            | 8.25              | 45.6        | 11.4          | 8.252    |
| 2     | UNKNOWN | 6.26        | 6.55       | 6.97      | 0.00            | 45.38             | 312.6       | 62.8          | 45.378   |
| 3     | UNKNOWN | 7.32        | 7.59       | 8.12      | 0.00            | 46.37             | 260.7       | 64.1          | 46.370   |
| Total |         |             |            |           |                 | 100.00            | 618.9       | 138.3         | 100.000  |

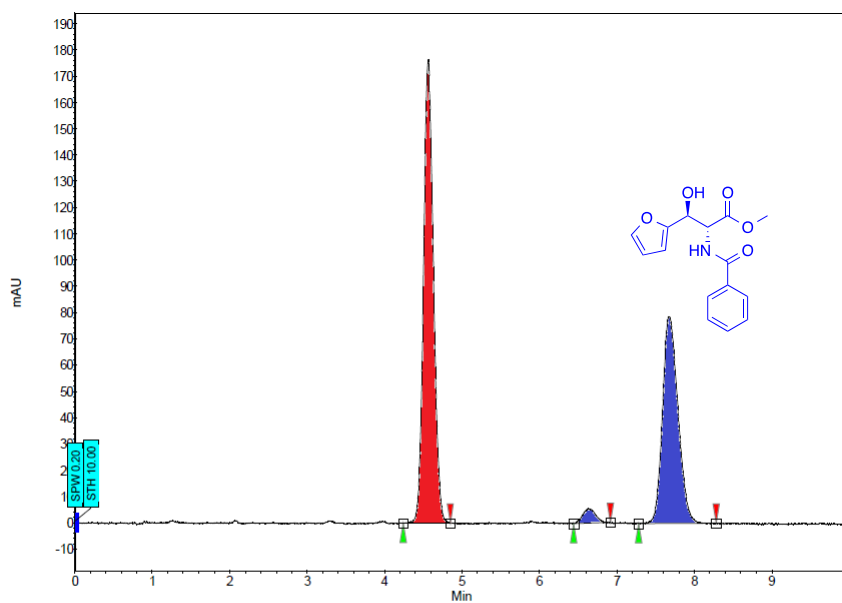

Results Table:

| Index | Name    | Start [Min] | Time [Min] | End [Min] | RT Offset [Min] | Quantity [% Area] | Height [μV] | Area [μV.Min] | Area [%] |
|-------|---------|-------------|------------|-----------|-----------------|-------------------|-------------|---------------|----------|
| 1     | UNKNOWN | 4.24        | 4.56       | 4.85      | 0.00            | 57.85             | 176.6       | 26.4          | 57.854   |
| 2     | UNKNOWN | 6.44        | 6.63       | 6.92      | 0.00            | 2.30              | 5.5         | 1.1           | 2.300    |
| 3     | UNKNOWN | 7.28        | 7.68       | 8.28      | 0.00            | 39.85             | 78.7        | 18.2          | 39.846   |
| Total |         |             |            |           |                 | 100.00            | 260.8       | 45.7          | 100.000  |

Measure of the enantiomeric excess for the *syn* compound :

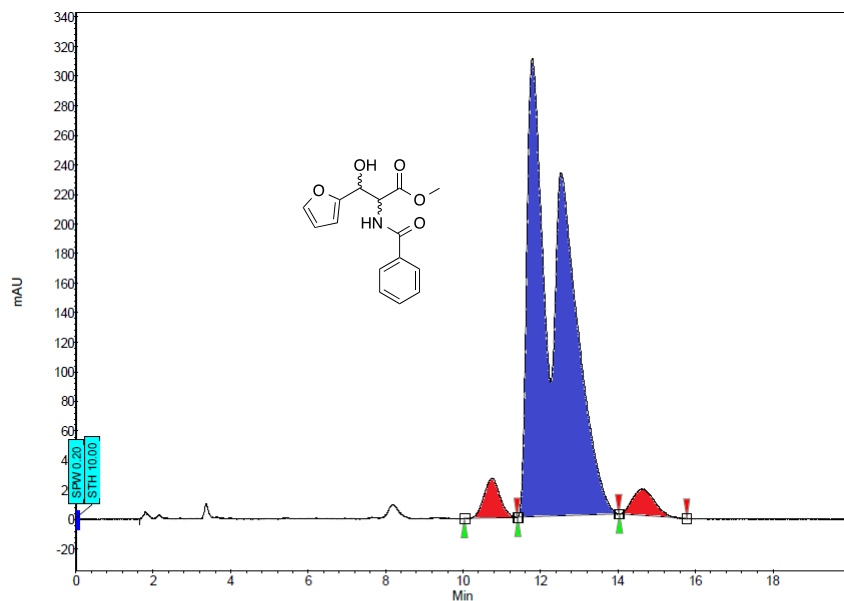

Results Table:

| Index | Name    | Start Time [Min] | Time [Min] | End [Min] | RT Offset [Min] | Quantity [% Area] | Height [μV] | Area [μV.Min] | Area [%] |
|-------|---------|------------------|------------|-----------|-----------------|-------------------|-------------|---------------|----------|
| 1     | UNKNOWN | 10.03            | 10.74      | 11.39     | 0.00            | 3.81              | 26.9        | 12.8          | 3.811    |
| 2     | UNKNOWN | 11.41            | 11.78      | 14.02     | 0.00            | 92.64             | 310.1       | 311.5         | 92.640   |
| 3     | UNKNOWN | 14.04            | 14.63      | 15.78     | 0.00            | 3.55              | 18.0        | 11.9          | 3.548    |
| Total |         |                  |            |           |                 | 100.00            | 355.0       | 336.2         | 100.000  |

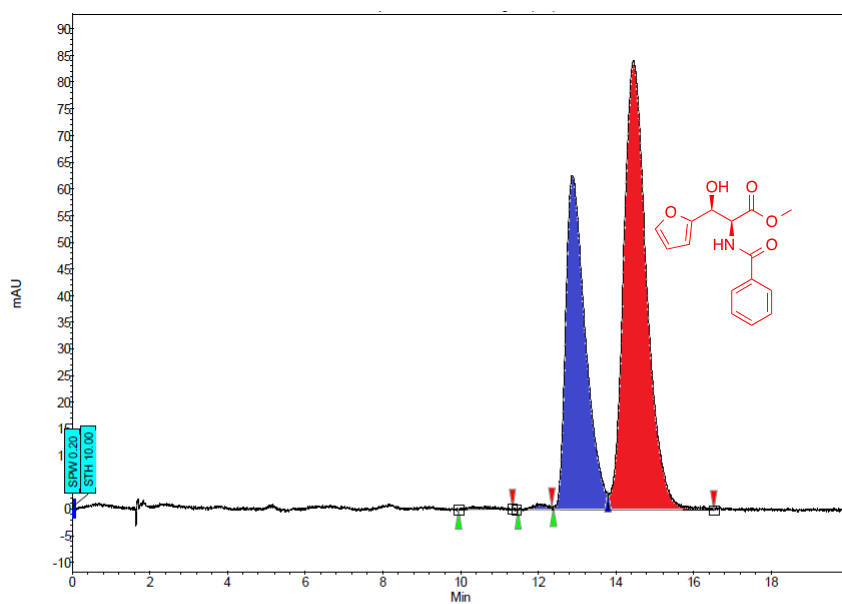

Results Table:

| Index | Name    | Start Time [Min] | Time [Min] | End [Min] | RT Offset [Min] | Quantity [% Area] | Height [μV] | Area [μV.Min] | Area [%] |
|-------|---------|------------------|------------|-----------|-----------------|-------------------|-------------|---------------|----------|
| 4     | UNKNOWN | 9.95             | 10.64      | 11.33     | 0.00            | 0.28              | 0.4         | 0.3           | 0.280    |
| 2     | UNKNOWN | 11.48            | 12.05      | 12.35     | 0.00            | 0.44              | 0.9         | 0.4           | 0.444    |
| 3     | UNKNOWN | 12.39            | 12.88      | 13.79     | 0.00            | 38.64             | 62.6        | 36.8          | 38.638   |
| 1     | UNKNOWN | 13.79            | 14.45      | 16.52     | 0.00            | 60.64             | 84.1        | 57.8          | 60.638   |
| Total |         |                  |            |           |                 | 100.00            | 147.9       | 95.4          | 100.000  |



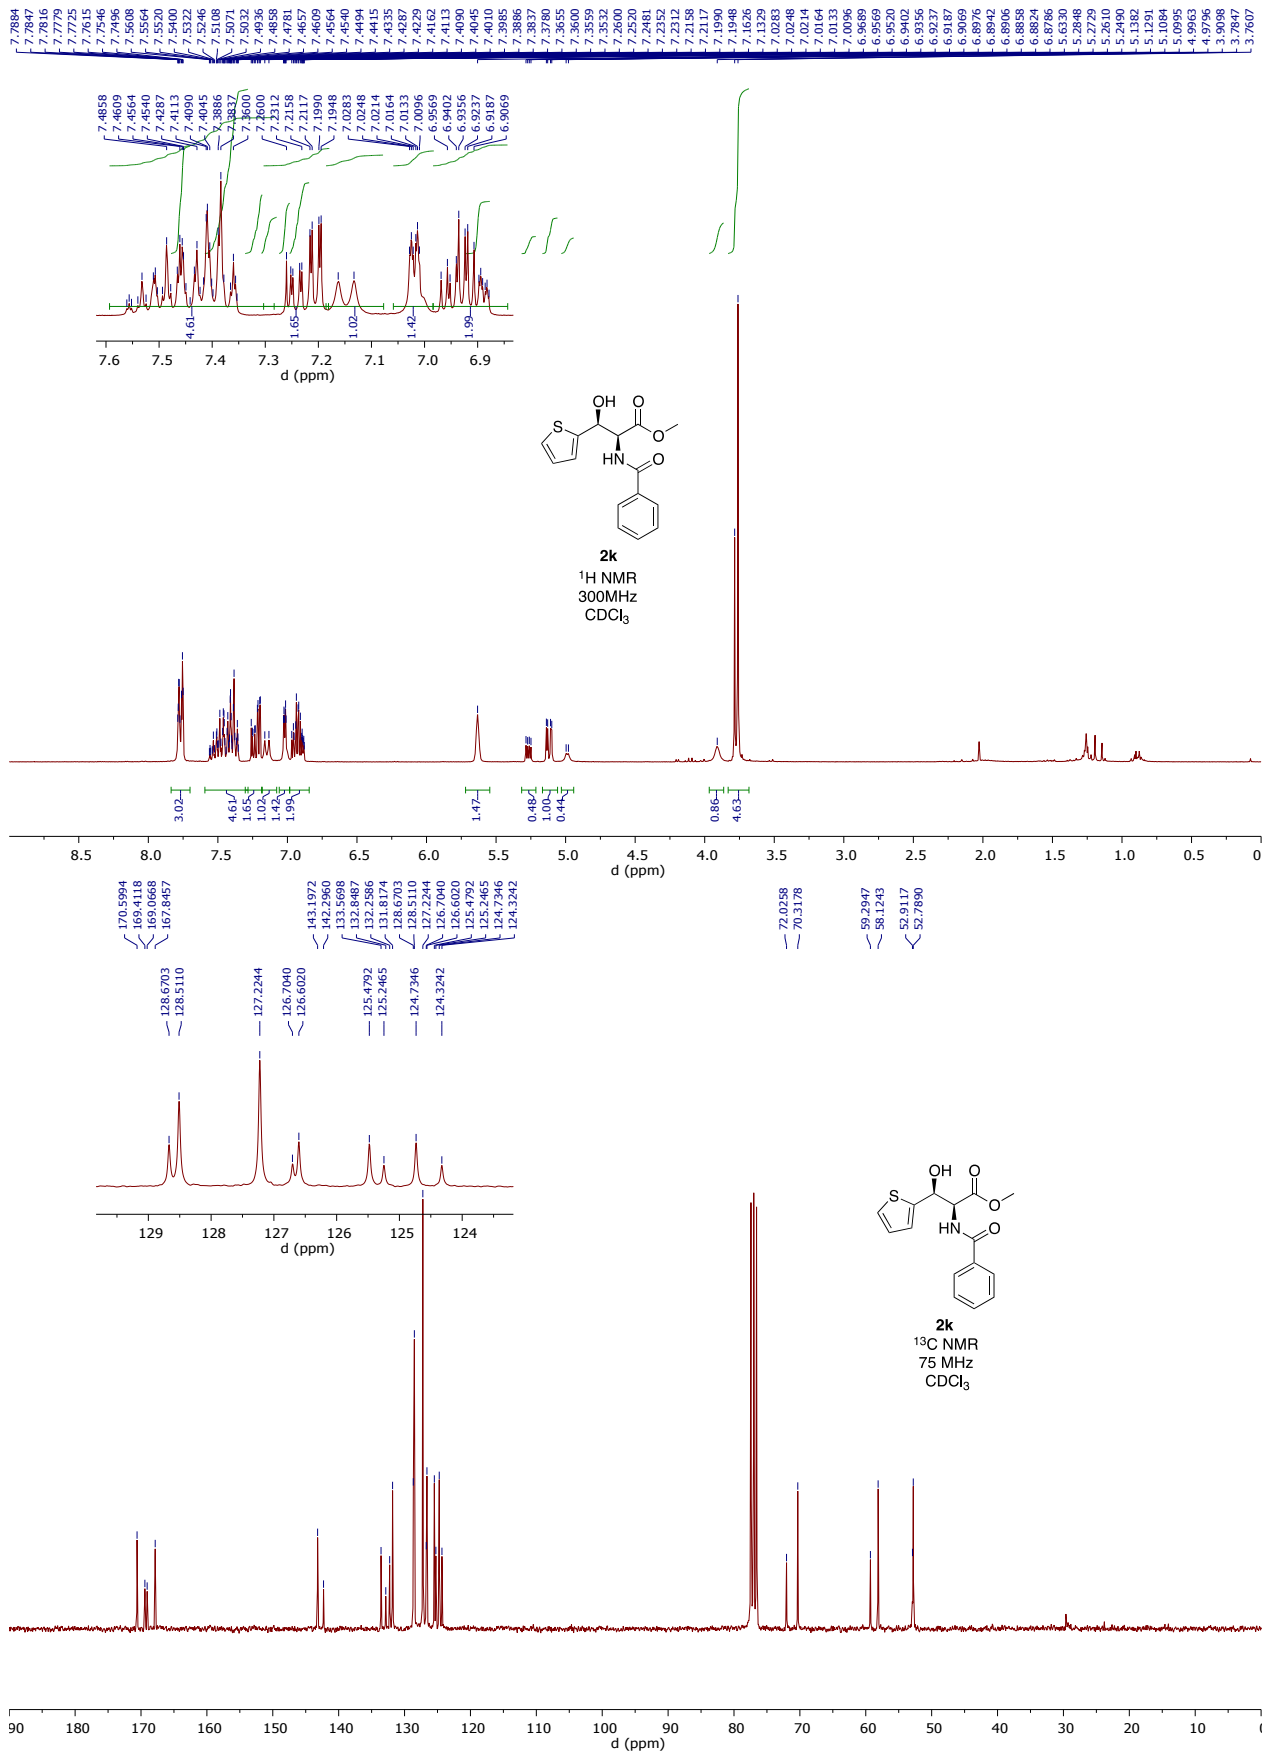

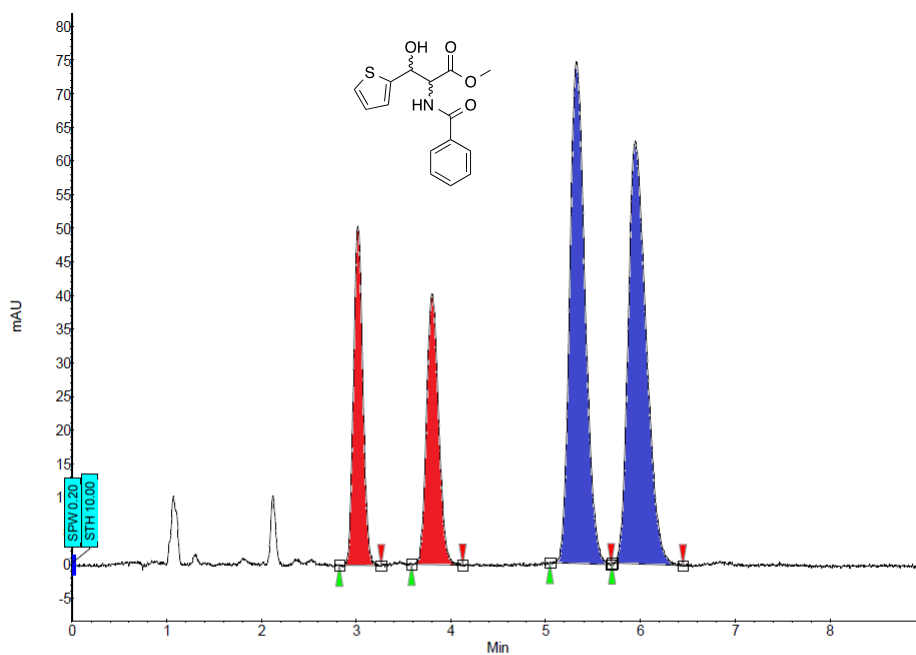

**Results Table:**

| Index | Name    | Start | Time  | End   | RT Offset | Quantity | Height     | Area           | Area    |
|-------|---------|-------|-------|-------|-----------|----------|------------|----------------|---------|
|       |         | [Min] | [Min] | [Min] | [Min]     | [% Area] | [ $\mu$ V] | [ $\mu$ V.Min] | [%]     |
| 1     | UNKNOWN | 2.82  | 3.02  | 3.27  | 0.00      | 14.38    | 50.4       | 5.7            | 14.378  |
| 2     | UNKNOWN | 3.58  | 3.80  | 4.12  | 0.00      | 14.89    | 40.3       | 5.9            | 14.889  |
| 3     | UNKNOWN | 5.04  | 5.32  | 5.69  | 0.00      | 35.48    | 74.5       | 14.1           | 35.483  |
| 4     | UNKNOWN | 5.70  | 5.95  | 6.45  | 0.00      | 35.25    | 62.9       | 14.0           | 35.249  |
| Total |         |       |       |       |           | 100.00   | 228.2      | 39.6           | 100.000 |

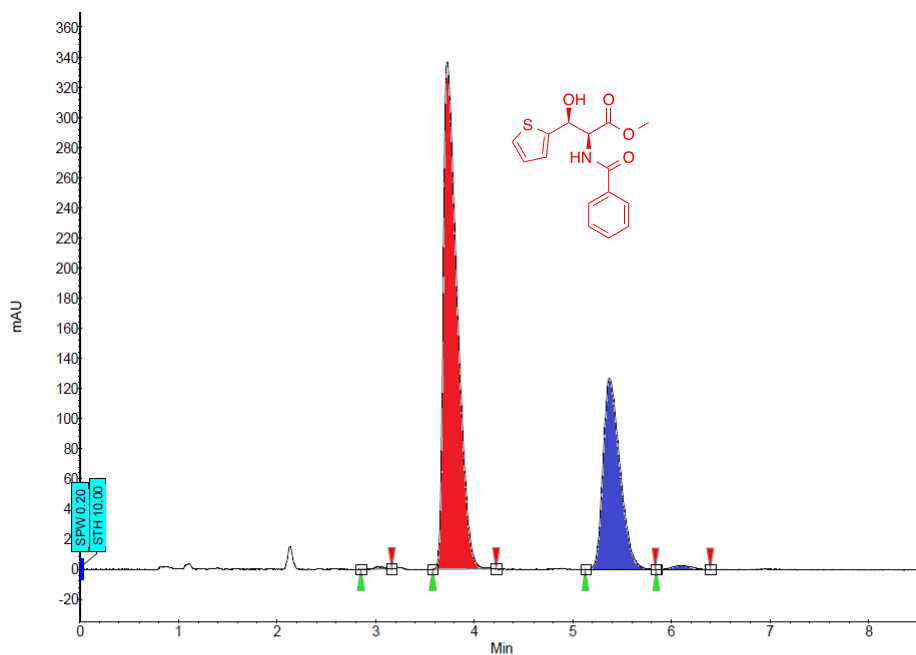

**Results Table:**

| Index | Name    | Start | Time  | End   | RT Offset | Quantity | Height     | Area           | Area    |
|-------|---------|-------|-------|-------|-----------|----------|------------|----------------|---------|
|       |         | [Min] | [Min] | [Min] | [Min]     | [% Area] | [ $\mu$ V] | [ $\mu$ V.Min] | [%]     |
| 1     | UNKNOWN | 2.85  | 3.03  | 3.16  | 0.00      | 0.23     | 1.4        | 0.2            | 0.229   |
| 2     | UNKNOWN | 3.58  | 3.73  | 4.22  | 0.00      | 67.85    | 336.9      | 55.5           | 67.849  |
| 3     | UNKNOWN | 5.13  | 5.37  | 5.84  | 0.00      | 31.22    | 127.0      | 25.5           | 31.224  |
| 4     | UNKNOWN | 5.84  | 6.09  | 6.39  | 0.00      | 0.70     | 2.8        | 0.6            | 0.698   |
| Total |         |       |       |       |           | 100.00   | 468.1      | 81.8           | 100.000 |
